# Supplementary material
Source: PubMed Central journal article supplement (PMC2982762)
Supplement: emboj2010239s1.pdf [file emboj2010239s1.pdf]

## Supplemental Data

### **Methyl-H3K9 Binding Protein MPP8 Mediates E-cadherin Gene Silencing and Promotes Tumor Cell Motility and Invasion**

Kenji Kokura<sup>1</sup>, Lidong Sun<sup>1</sup>, Mark T. Bedford<sup>2</sup>, Jia Fang<sup>1\*</sup>

## Supplemental Experimental Procedures

### **Generation of Chromodomain Protein Microarray and Peptide Hybridization**

The cDNAs encoding the various chromodomains listed in Fig.1 were cloned into expression vector pGEX-KG by PCR using a cDNA library (ORIGENE, INC) and verified by DNA sequencing. GST fusion proteins were purified and arrayed in duplicate using a FLEXYS® robot (Genomic Solutions) as previously described (Espejo et al, 2002; Kim et al, 2006). Peptides were synthesized by the W. M. Keck Biotechnology Resource Center (New Haven, CT). Methylated forms of the following peptides were synthesized:

histone H3 (1-18) - acetyl-ARTKQTARKSTGGKAPRK-biotin and

histone H3 (18-36) - acetyl-KQLATKAARKSAPATGGVK-biotin.

Biotinylated peptides (10 µg) were prebound to 5 µl of Cy3-Streptavidin (Fluorolink™, GE Healthcare) in 500 µl PBST. The fluorescent-labeled peptide was then incubated with 20 µl of biotin agarose beads (Sigma) to remove the free Streptavidin label. Arrayed slides were blocked in PBST with 3% powdered milk, followed by the addition of 400 µl fluorophore-tagged peptide. Blocking and hybridization were performed in an Atlas Glass Hybridization Chamber (Clontech). After one hour of incubation at room temperature, the unbound peptide was washed away with PBST, three times for 10 minutes each. A GenePix 4200A laser scanner (Axon, Inc.) was used for array analysis.

### **MPP8 Cloning and In vitro Binding Assays**

Human *MPP8* was cloned from several overlapping EST clones and verified by sequencing. The *MPP8* (W80A) mutant was generated by overlapping PCR and confirmed by DNA sequencing. For antibody generation, cDNA encoding *MPP8* N-terminal (a-188 aa) was

subcloned into pGEX-KG vector. Recombinant MPP8 protein was purified using Glutathione-Agarose followed with Thrombin (Sigma) digestion and used as antigen to generate antibodies in rabbit. In vitro transcription/translation and peptide pull-down assays were performed essentially as described previously (Cao et al, 2002). Briefly, full-length *MPP8* wild-type, W80A mutant and *HP1 $\alpha$*  cDNA were subcloned into pCITE-4a vector (Novagen) and was transcribed and translated using the T7 coupled TNT Reticulocyte Lysate System (Promega) following manufacturer's instruction. For peptide pull-down assays, 1  $\mu$ g of biotinylated histone H3 peptides (aa 1-20 or aa 18-37) that were either un-, mono-, di- or tri-methylated on K9 or K27 were immobilized on 6  $\mu$ l of streptavidin sepharose (GE healthcare) in BC150 (40 mM HEPES-KOH, 0.2 mM EDTA, 1 mM DTT, 150 mM KCl, pH 7.9) containing 0.05 % NP40. After washing, the beads were mixed with 5  $\mu$ l in vitro translated MPP8 proteins in 300  $\mu$ l BC150 and incubated at 4 °C for 2 hours. After washing with BC500 (for MPP8) or BC150 (for HP1 $\alpha$ ) containing 0.05 % NP40 three times, bound proteins were eluted in SDS loading buffer, resolved by SDS-PAGE and subjected to autoradiography.

### **Immunostaining and microscopy**

For staining, about  $1 \times 10^5$  wild-type and *Suv39h1/2* null MEF cells were seeded onto gelatin-coated coverslips in each well of a 12-well and transfected with vectors expressing Flag-tagged MPP8 wild-type or W80A mutant using Effectene (Qiagen). 24 hrs after transfection, cells were washed twice with PBS and then fixed in 4% paraformaldehyde (in PBS) for 10 min at room temperature. After washing with PBS, cells were incubated with 0.5% Triton X-100 (in PBS) for 5 min at 4°C and then blocked with 1% bovine serum albumin (in PBS) for 30 min. Staining was carried out using mouse anti-Flag M2 (Sigma) and chicken anti-H3K9me3 antibodies for 1 hour at room temperature. After three washes with PBS, the cells were first incubated with rhodamine conjugated donkey anti-mouse IgG and FITC-conjugated donkey anti-rabbit IgG (Jackson ImmunoResearch Laboratories) for 30 min and then stained with 4',6'-diamidino-2-phenylindole (DAPI) (Sigma) for 10 s. After three washes with PBS, cells were mounted and visualized by a Zeiss immunofluorescence microscope. For E-cadherin antibody (BD Bioscience) staining, cells on gelatin-coated coverslips were fixed with cold methanol for 10 min at -20 °C and washed three times with TBS (25 mM Tris-Cl, pH=7.4; 1 mM CaCl<sub>2</sub>; 0.137 M NaCl; 0.027 M KCl) before blocking with 1% BSA in TBS at room temperature for 30 min.

For Differential interference contrast (DIC) microscopy, cells were grown on glass bottom culture dishes (MatTek Corp., MA, USA). And DIC pictures of live cells are taken from a Zeiss automatic fluorescent Inverted microscope.

### **Immunoprecipitation and Luciferase Assays**

For IP, 293T cells were transfected with various expression vectors in 10-cm dishes for 36 hrs and lysated with IPH buffer containing 5 mM EDTA. Immunoprecipitations were performed with 1  $\mu$ g of mouse IgG (Jackson), anti-Myc (9E10, SantaCruz), anti-HA antibody (12CA5) together with 10  $\mu$ l of protein-G agarose (Invitrogen) or 10  $\mu$ l of anti-FLAG M2 beads (Sigma). After washing with IPH buffer containing 300 mM or 600 mM KCl (high-salt) three times, IPed proteins were analyzed by western blot using indicated antibodies. For endogenous IPs, 293T cell lysates were incubated with 1  $\mu$ g of each IgG, anti-GLP (Bethyl Laboratories), anti-ESET, and anti-MPP8 antibodies.

For luciferase assays, wild-type or *MPP8* stable knockdown 293T cells were transfected with E-cad-Luc reporter (Shi et al, 2003) and internal control vector pSV40- $\beta$ -galactosidase with or without vector expressing HA-tagged MPP8 wt or W80A mutant. Cell extracts were prepared for 36 hrs after transfection and activities for luciferase and  $\beta$ -galactosidase were measured using Luciferase assay system (Promega) and ONPG (Sigma), respectively. All experiments were performed in triplicates.

### **ChIP Assay, RT-PCR and DNA Methylation Assays**

Chromatin IP assays were carried out as previously described (Cao & Zhang, 2004) with modifications. Briefly, control, *MPP8* stable knockdown and rescue MDA-MB-231 cells were cross-linked with formaldehyde (for histones) or DSS (10 mM) and formaldehyde (for enzymes). Chromatin was digested with MNase (Worthington) followed by sonication using Bioruptor. ChIP assays were then performed with IgG, anti-MPP8, anti-GLP (Bethyl Laboratories) and anti-DNMT3A (Imgenex) antibodies. ChIP grade antibodies against histone H3, mono-, di-, and trimethylated H3K9 were purchased from Abcam (ab1791, ab9045, ab1220 and ab8898). Anti-acetyl-Histone H3 antibody was purchased from Millipore (06-599). ChIPed DNA was detected by real-time qPCR using primer pairs for *E-cadherin* gene:

Promoter: TAGAGGGTCACCGCGTCTAT and CTGCGGCTCCAAGGGCCCA

-1kb region: AAAGTGGAGCTTTGGGAGGT and ACTATGTTGCCGAGGCTGAT

Exon 2 region: GAGGGGCGGCGCTGTTGGTTTCGGTGAG and  
ACCGGCAGCGCGCCCTCACCTCTGC.

Primer pair TAGAGGGTCACCGCGTCTAT and GCTCTCCAGCGGTTCCATCTTCCA was used for ChIP assays in the promoter region of the exogenous E-cad-Luc reporter.

Primer pair AAAGAAAGGGAGCGGGATGGG and CTTGTGTGAAGCGAAGGGGTTG was used for *Fibronectin* promoter region.

Primer pair GCTCACCACTCCTTCACCGTAA and GGAGGCTGGTGAGGACAGAGAT was used for *APCS* promoter region.

For RT-PCR, total RNA was prepared using RNeasy mini kit (Qiagen) and cDNA was synthesized using ImPromII Reverse Transcription System (Promega). PCR reactions were carried out with primers for *GAPDH* (Ting et al, 2005) and primers for *E-cadherin*:

GAGAGGAATCCAAAGCCTCAGGTC and CTGGTTATCCATGAGCTTGAGATTG and primers for *APCS*: TCTGTCCTCACCGCCTCCT and TCATTATCCCTGCCTTGGGTAT

qPCR primers for MethylScreen DNA methylation analyses are:

Island1: TAGAGGGTCACCGCGTCTAT and CTGCGGCTCCAAGGGCCCA

Island2: CACCCGGCGCCTGCCCTCGCTCGG and GCGAGGCTTCCAGGCCGCTCCGCTC

Island3: GAGCGGAGCGGCCTGGAAGCCTCGC and ACCCCCTACACCCCGCTTCACGCC

Island4: GATAAGAAAGTGAGGTCGGAGGAGGTG and CCCACCCCGAAACCTACGGC

Island5: GGAACGGTGGGCTAGGTCTTGAG and CCTCCTGCTCACCGAAACCAACA

Island6: GAGGGGCGGCGCTGTTGGTTTCGGTGAG and  
ACCGGCAGCGCGCCCTCACCTCTGC.

Kokura, et al., Fig. S1

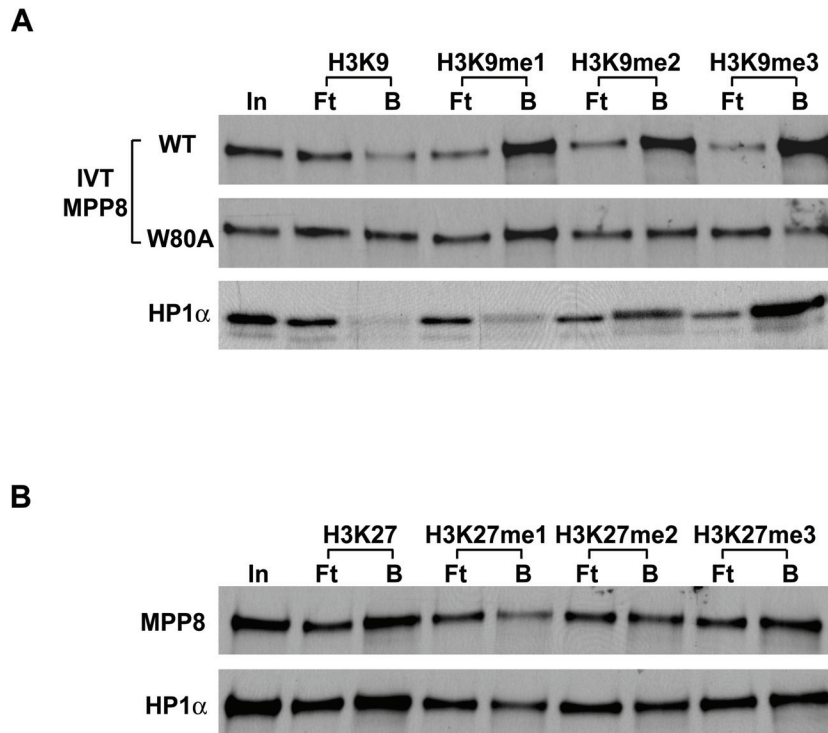

**Figure S1.** MPP8 recognizes chemically installed methyl-H3K9 analogues. <sup>35</sup>S-labeled in vitro translated MPP8-wt or W80A mutant was incubated with immobilized histone H3 containing chemically installed methyl-lysine analogues at H3K9 (**A**) and H3K27 (**B**). Different methylation states from alkylation reactions were indicated. “In” represents 10% of total input, “B” and “Ft” represent bound and flow-through, respectively. HP1α serves as positive controls in the parallel experiment.

## Kokura, et al., Fig. S2

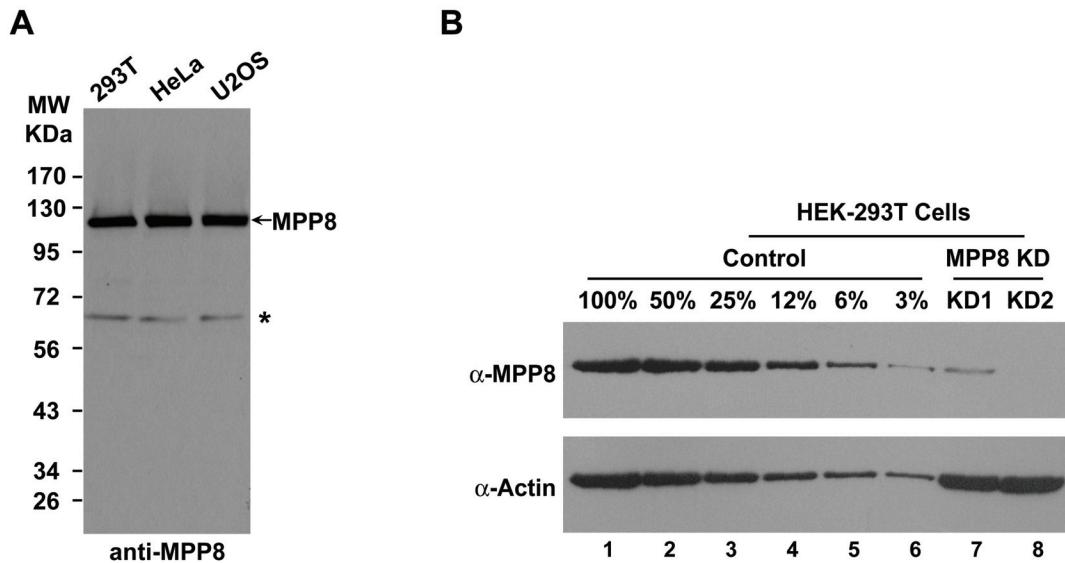

**Figure S2.** MPP8 antibody is highly specific. **(A)** 150 µg whole cell extracts from different cell lines were analyzed by western blot using anti-MPP8 antibody. A minor non-specific band is marked with a star. **(B)** Western blot analysis of stable *MPP8* knockdown HEK-293T cells. Knocking-down efficiency was estimated by comparing with the control cells infected with mock virus. Actin was used as a loading control.

**Kokura, et al., Fig. S3**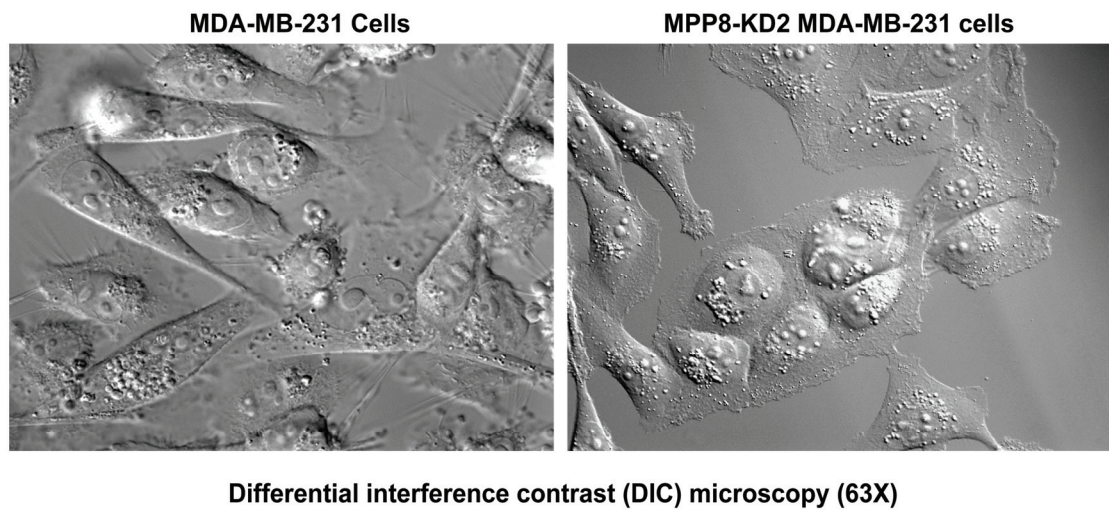

**Figure S3.** *MPP8* knockdown in MDA-MB-231 cells results in moderate morphology changes. Control and *MPP8*-KD2 MDA-MB-231 cells were grown on glass bottom culture dishes and the differential interference contrast (DIC) images of live cells were taken using a Zeiss automatic fluorescent Inverted microscope.

Kokura, et al., Fig. S4

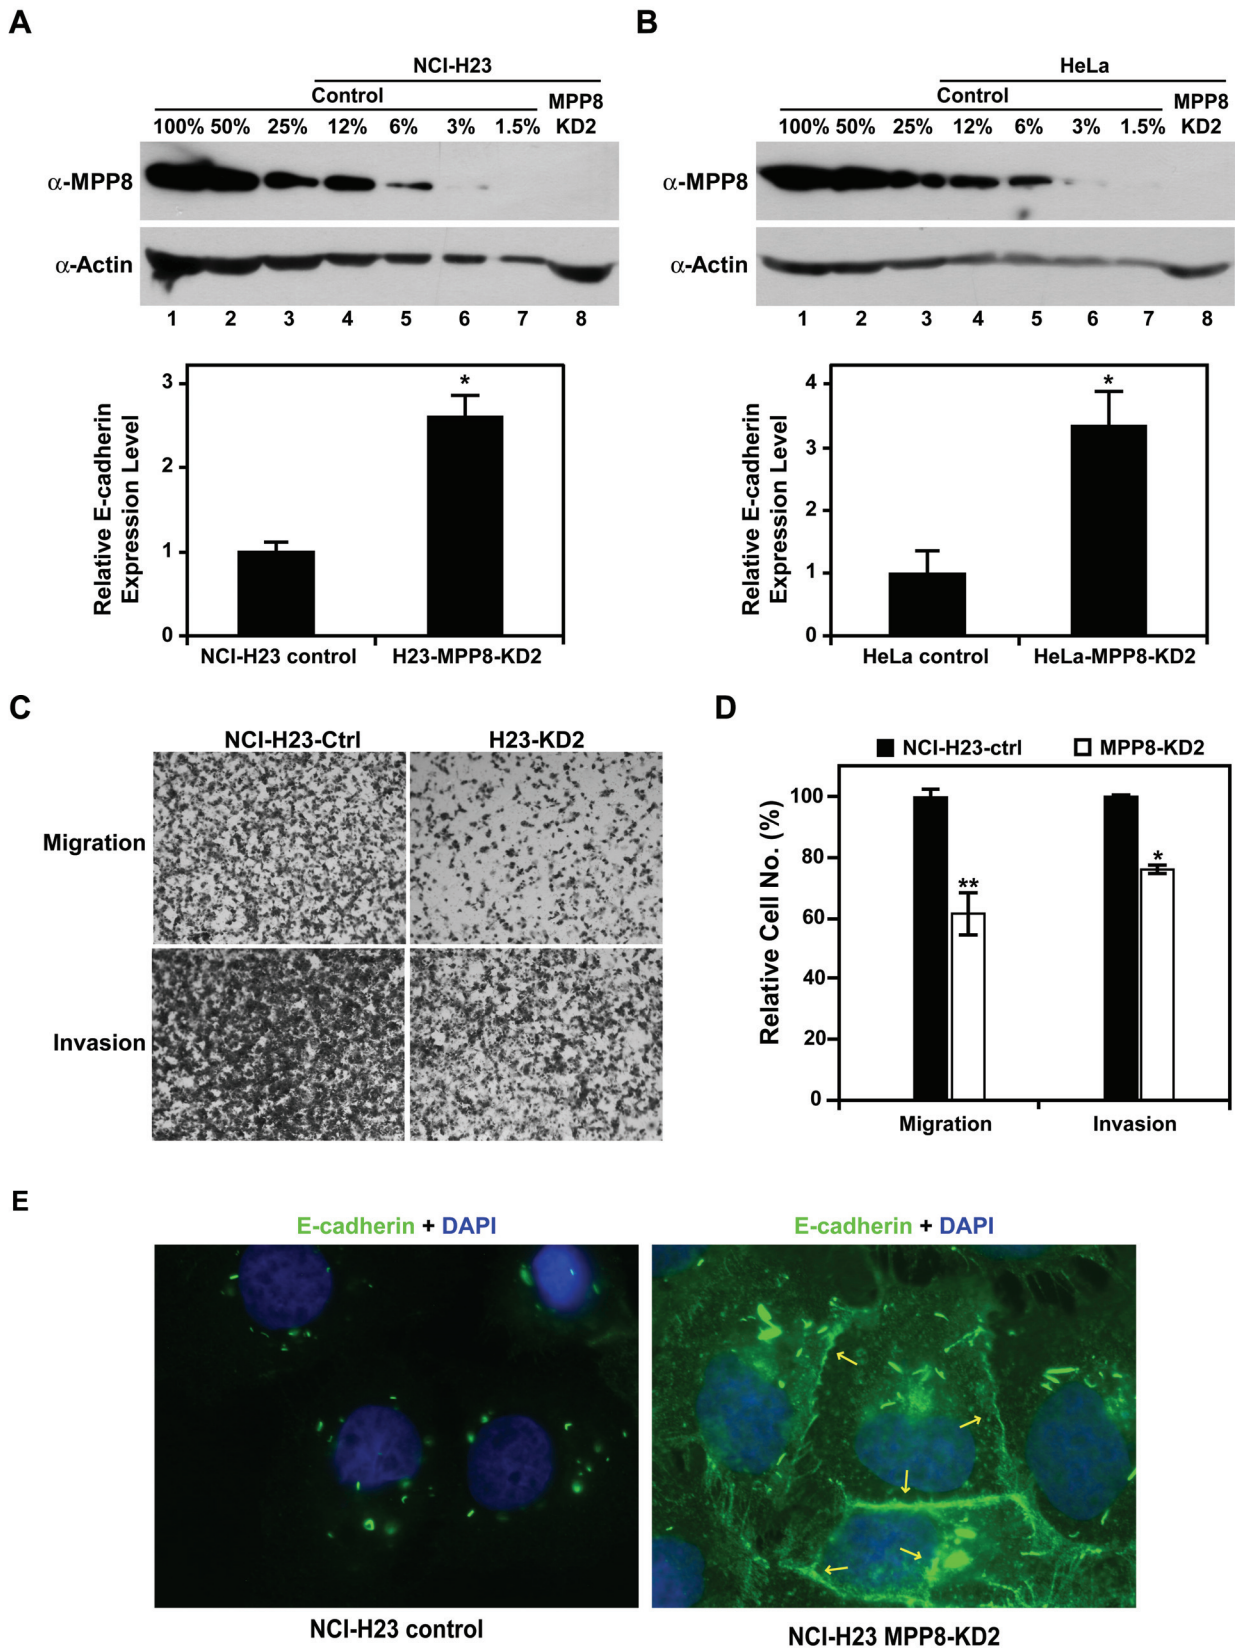



**Figure S4.** *MPP8* knockdown de-represses *E-cadherin* expression in different tumor cell lines. **(A)** Knocking-down *MPP8* in non-small cell lung cancer cells NCI-H23 de-represses *E-cadherin* expression. Top panels are western blot analysis of control and *MPP8* stable knockdown (KD2) NCI-H23 cells. Bottom panel shows the RT-qPCR analysis of control and *MPP8*-KD2 NCI-H23 cells. qPCR results were derived from three independent samples ( $\pm$  s.d.) and normalized to *GAPDH*. **(B)** Knocking-down *MPP8* in HeLa cells causes de-repression of *E-cadherin*. Top panels are western blot analysis of control and *MPP8* stable knockdown (KD2) HeLa cells. Bottom panel shows the RT-qPCR analysis of control and *MPP8*-KD2 HeLa cells. qPCR results were derived from three independent samples ( $\pm$  s.d.) and normalized to *GAPDH*. **(C, D)** Migration and invasion assays of control and *MPP8* knock-down (KD2) NCI-H23 cells. Cells were induced to move or invade through uncoated or Matrigel-coated membranes for 24 or 48 h respectively. Membranes were then fixed, photographed **(C)** or quantitated **(D)**. Columns represent the mean of triplicate assays ( $\pm$  s.d.). Control cell numbers were normalized as 100%. **(E)** Merged images of cold methanol fixed control and *MPP8*-KD2 NCI-H23 cells stained with E-cadherin (green) antibody and DAPI (blue). Yellow arrows show E-cadherin on cell membrane enables the cells to establish cell-cell contacts. In all panels, ‘\*’ Represents *P* values <0.01 and ‘\*\*’ represents *P* values <0.05.

Kokura, et al., Fig. S5

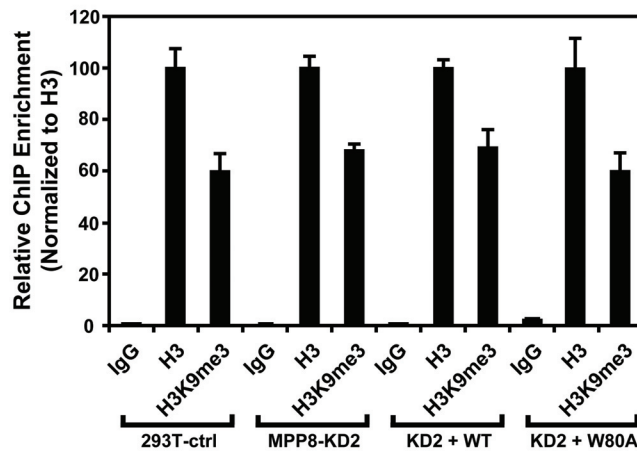

**Figure S5.** ChIP analysis using H3K9me3- and H3- specific antibodies. qPCR was conducted using primers specific for exogenous E-cad-Luc promoter and chromatin derived from control, *MPP8* knockdown and rescue 293T cells. ChIP enrichment of H3 antibody is normalized to 100% in each assayed cells. Graphs show the mean of relative ChIP enrichment values (n=3) with s.d. (error bars).

Kokura, et al., Fig. S6

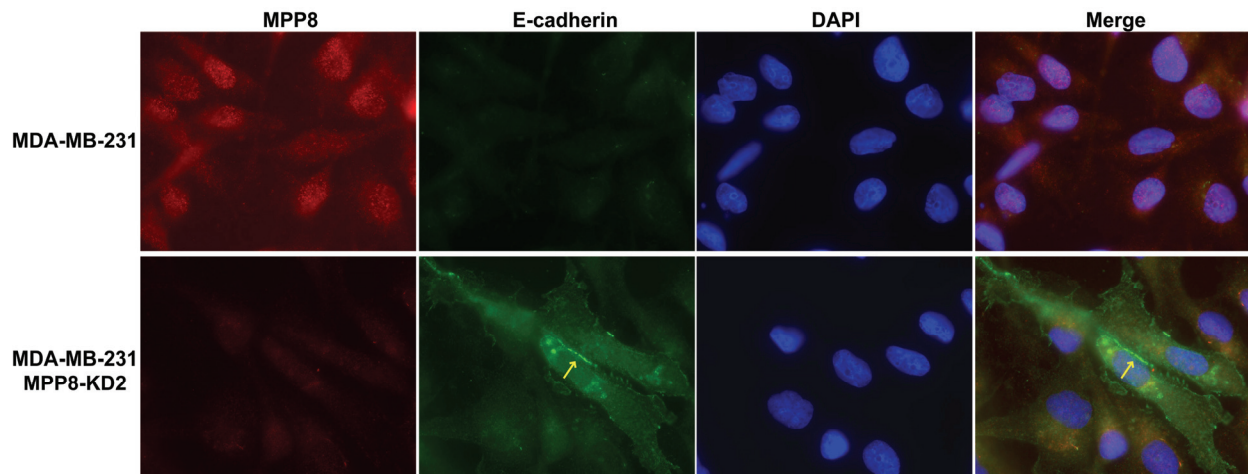

**Figure S6.** Re-expressed E-cadherin in *MPP8* knockdown MDA-MB-231 cells localizes on the cell membrane. Control and *MPP8* knockdown (KD2) MDA-MB-231 cells were fixed with cold methanol and co-stained with anti- E-cadherin (green) and MPP8 (red) antibodies. DAPI (blue) shows nuclei. Yellow arrows show E-cadherin on cell membrane enables the cells to establish cell-cell contacts.

Kokura, et al., Fig. S7

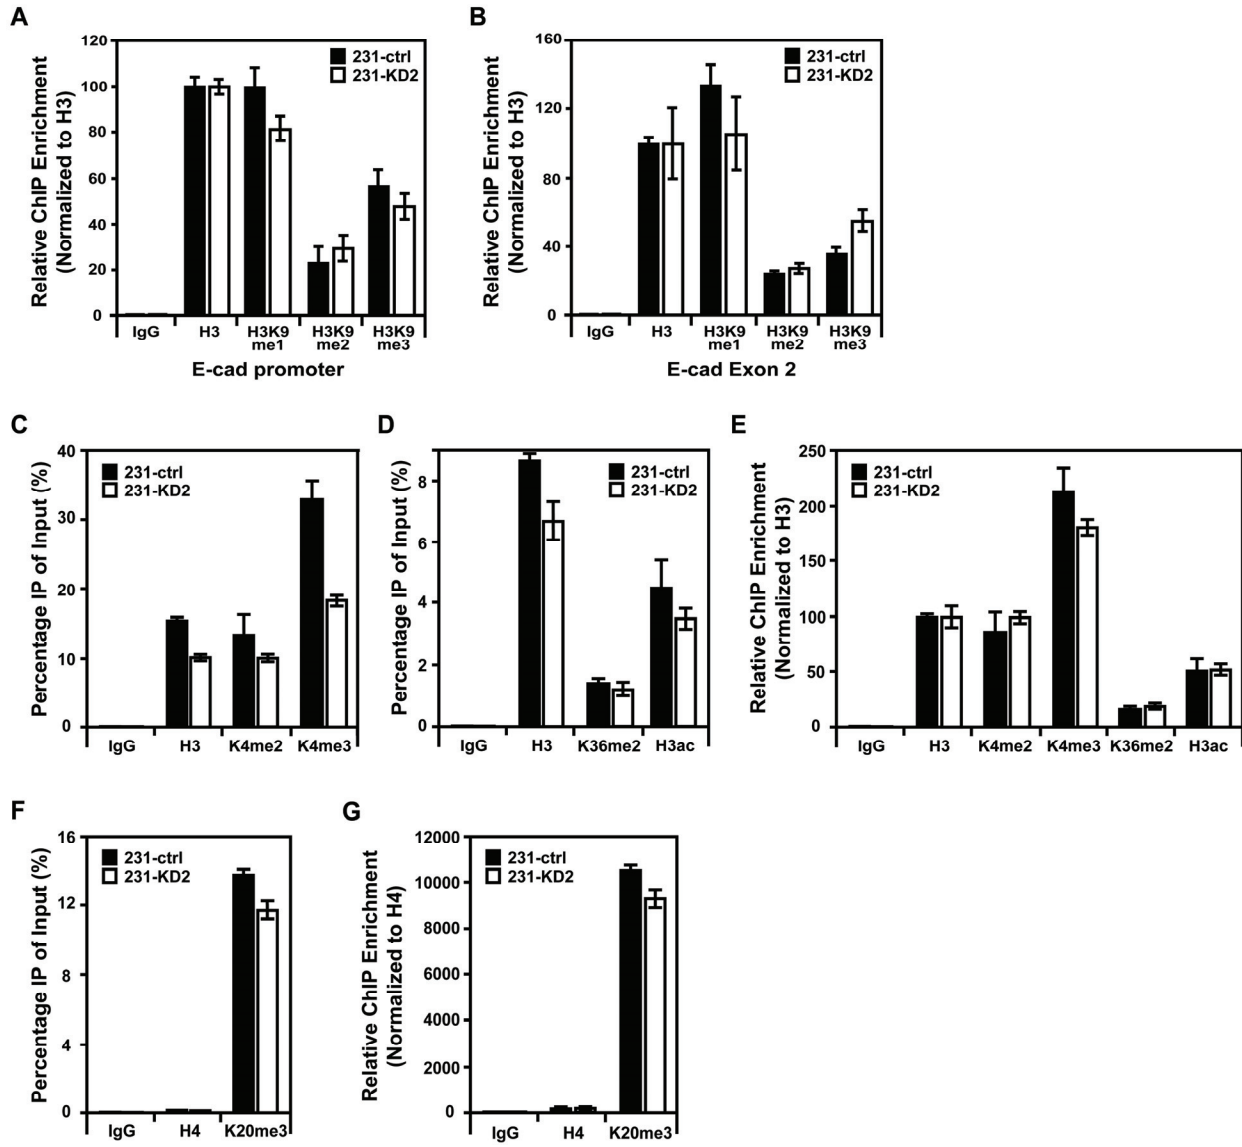

**Figure S7. (A, B)** ChIP-qPCR analysis using specific antibodies for H3, H3K9me1, H3K9me2 and H3K9me3, and chromatin derived from control and *MPP8* knockdown MDA-MB-231 cells. qPCR was conducted using primers specific for *E-cadherin* promoter **(A)** and exon2 **(B)**. ChIP enrichment of H3 antibody is normalized to 100% in each assayed cells. Graphs show the mean of relative ChIP enrichment values (n=3) with s.d. (error bars). **(C-E)** ChIP-qPCR analysis using specific antibodies for H3, H3K4me2, H3K4me3 **(C)** H3, H3K36me2, H3ac **(D)**, and chromatin derived from control and *MPP8* knockdown (KD2) MDA-MB-231 cells. qPCR was conducted using primers specific for *E-cadherin* promoter. Graphs show the mean ChIP enrichment values (n=3) with s.d. (error bars). **(E)** Same results in **(C-D)** with ChIP enrichment of H3 antibody normalized to 100% in each assay. Graphs show the mean of relative ChIP enrichment values (n=3) with s.d. (error bars). **(F)** ChIP-qPCR analysis using specific antibodies for H4 and H4K20me3 and chromatin derived from control and *MPP8* knockdown MDA-MB-231 cells. qPCR was conducted using primers specific for *E-cadherin* promoter. Graphs show the mean ChIP enrichment values (n=3) with s.d. (error bars). **(G)** Same results in **(F)** with ChIP enrichment of H4 antibody normalized to 100%. Graphs show the mean of relative ChIP enrichment values (n=3) with s.d. (error bars).

Kokura, et al., Fig.S8

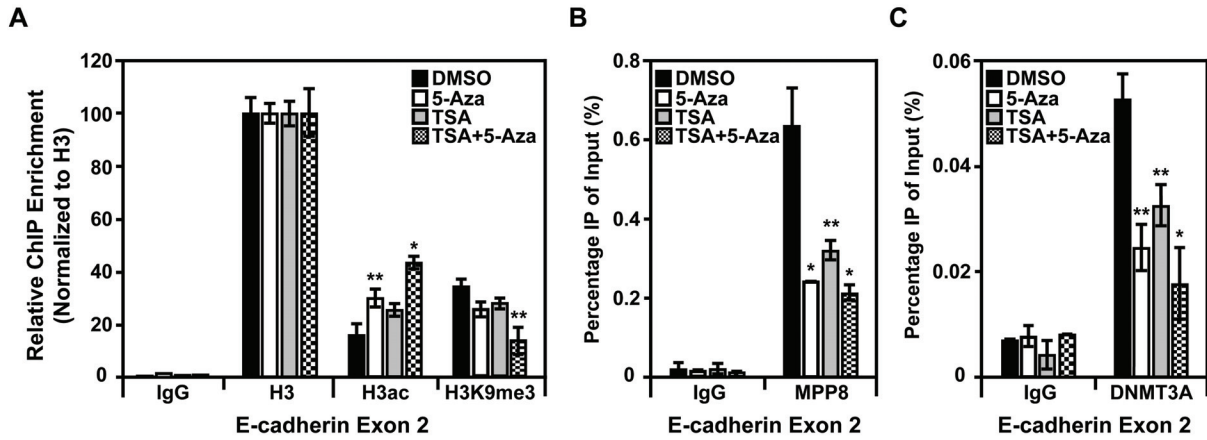

**Figure S8.** ChIP-qPCR analysis using specific antibodies for H3ac, H3K9me3 (A), MPP8 (B) and DNMT3A (C), and chromatin derived from MDA-MB-231 cells treated with DMSO, 5-Aza, TSA or both inhibitors. qPCR was conducted using primers specific for *E-cadherin* exon 2. Graphs show the mean ChIP enrichment values (n=3) with s.d. (error bars). In all panels, ‘\*’ represents *P* values <0.01 and ‘\*\*’ represents *P* values <0.05.

Kokura, et al., Fig. S9

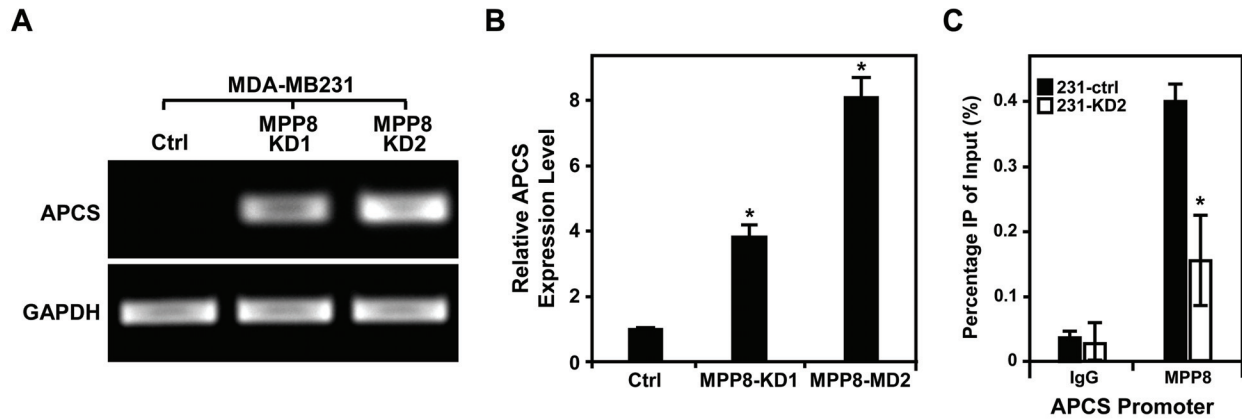

**Figure S9** MPP8 represses *APCS* gene expression. **(A)** *APCS* mRNA levels in control and two *MPP8* stable knockdown MDA-MB-231 cells were assayed with RT-PCR. *GAPDH* serves as controls. **(B)** RT-qPCR analysis of control and *MPP8* knockdown MDA-MB-231 cells. qPCR results were derived from three independent samples ( $\pm$  s.d.) and normalized to *GAPDH*. **(C)** ChIP-qPCR analysis using MPP8 antibody and chromatin derived from control and *MPP8* knockdown (KD2) MDA-MB-231 cells. qPCR was conducted using primers specific for *APCS* promoter. In all panels, ‘\*’ represents *P* values <0.01.

**Supplemental References**

Cao R, Wang L, Wang H, Xia L, Erdjument-Bromage H, Tempst P, Jones RS, Zhang Y (2002) Role of histone H3 lysine 27 methylation in Polycomb-group silencing. *Science (New York, NY)* **298**(5595): 1039-1043

Cao R, Zhang Y (2004) SUZ12 is required for both the histone methyltransferase activity and the silencing function of the EED-EZH2 complex. *Molecular cell* **15**(1): 57-67

Espejo A, Cote J, Bednarek A, Richard S, Bedford MT (2002) A protein-domain microarray identifies novel protein-protein interactions. *The Biochemical journal* **367**(Pt 3): 697-702

Kim J, Daniel J, Espejo A, Lake A, Krishna M, Xia L, Zhang Y, Bedford MT (2006) Tudor, MBT and chromo domains gauge the degree of lysine methylation. *EMBO reports* **7**(4): 397-403

Shi Y, Sawada J, Sui G, Affar el B, Whetstine JR, Lan F, Ogawa H, Luke MP, Nakatani Y, Shi Y (2003) Coordinated histone modifications mediated by a CtBP co-repressor complex. *Nature* **422**(6933): 735-738

Ting AH, Schuebel KE, Herman JG, Baylin SB (2005) Short double-stranded RNA induces transcriptional gene silencing in human cancer cells in the absence of DNA methylation. *Nature genetics* **37**(8): 906-910



**Supplemental Table**

Dysregulated gene list in response to *MPP8* knockdown in MDA-MB-231 cells.

**Positive genes (621)**

| Row   | Gene ID   | Gene Name      | Score(d) | Numerator | Denominator | Fold Change  | q-value(%) | Row     | Gene ID  | Gene Name      | Score(d) | Numerator | Denominator | Fold Change | q-value(%) |
|-------|-----------|----------------|----------|-----------|-------------|--------------|------------|---------|----------|----------------|----------|-----------|-------------|-------------|------------|
| 4843  | APCS      | 206350. at     | 0.774597 | 2         | 2.581989    | 4.56015877   | 0          | 15467   | RHOJ     | 235489. at     | -0.7746  | -2        | 2.581989    | 0.159713    |            |
| 6979  | PTGER3    | 211909. x. at  | 0.774597 | 2         | 2.581989    | 4.31777909   | 0          | 5306    | HLA-DRB4 | 208306. x. at  | -0.7746  | -2        | 2.581989    | 0.189276    |            |
| 8870  | LOC390411 | 216387. x. at  | 0.774597 | 2         | 2.581989    | 4.108935813  | 0          | 12397   | PAPPA    | 224940. s. at  | -0.7746  | -2        | 2.581989    | 0.200602    |            |
| 860   | ATP11B    | 1564063. a. at | 0.774597 | 2         | 2.581989    | 3.853361946  | 0          | 4189    | L1CAM    | 204584. at     | -0.7746  | -2        | 2.581989    | 0.209411    |            |
| 7993  | MST1      | 213382. a. at  | 0.774597 | 2         | 2.581989    | 3.572839506  | 0          | 12394   | PTGFRN   | 224937. at     | -0.7746  | -2        | 2.581989    | 0.210079    |            |
| 9048  | RPS2      | 217466. x. at  | 0.774597 | 2         | 2.581989    | 3.554504832  | 0          | 6491    | ANXA2    | 210427. x. at  | -0.7746  | -2        | 2.581989    | 0.222534    |            |
| 330   | DGKE      | 1554621. at    | 0.774597 | 2         | 2.581989    | 3.362725451  | 0          | 3228    | THBS2    | 203063. at     | -0.7746  | -2        | 2.581989    | 0.233729    |            |
| 5538  | GOLGA8B   | 208797. s. at  | 0.774597 | 2         | 2.581989    | 3.362508165  | 0          | 1093    | RPS24    | 200061. s. at  | -0.7746  | -2        | 2.581989    | 0.239377    |            |
| 14795 | SUHW2     | 230789. at     | 0.774597 | 2         | 2.581989    | 3.328965517  | 0          | 8044    | ANXA2    | 213503. x. at  | -0.7746  | -2        | 2.581989    | 0.240569    |            |
| 243   | TWIST2    | 1554163. at    | 0.774597 | 2         | 2.581989    | 3.275681342  | 0          | 2046    | ANXA2    | 201590. x. at  | -0.7746  | -2        | 2.581989    | 0.242289    |            |
| 4632  | OAS1      | 205552. s. at  | 0.774597 | 2         | 2.581989    | 3.269515918  | 0          | 201981  | at       | 201981. at     | -0.7746  | -2        | 2.581989    | 0.244925    |            |
| 6552  | SYNGR1    | 210613. s. at  | 0.774597 | 2         | 2.581989    | 3.182556497  | 0          | 2368    | PAPPA    | 228128. x. at  | -0.7746  | -2        | 2.581989    | 0.246706    |            |
| 180   | ZNF548    | 1553718. at    | 0.774597 | 2         | 2.581989    | 3.089891018  | 0          | 1055    | CFL1     | 200021. at     | -0.7746  | -2        | 2.581989    | 0.255073    |            |
| 8796  | CYP2C9    | 216025. x. at  | 0.774597 | 2         | 2.581989    | 2.997366441  | 0          | 6986    | EEF1G    | 211927. x. at  | -0.7746  | -2        | 2.581989    | 0.257963    |            |
| 4836  | RYR3      | 206306. at     | 0.774597 | 2         | 2.581989    | 2.981069959  | 0          | 7491    | GAPDH    | 212581. x. at  | -0.7746  | -2        | 2.581989    | 0.258163    |            |
| 15926 | GPX2      | 239595. at     | 0.774597 | 2         | 2.581989    | 2.942834138  | 0          | 6805    | EEF1G    | 211345. x. at  | -0.7746  | -2        | 2.581989    | 0.261035    |            |
| 642   | ADAMTSL3  | 1557818. x. at | 0.774597 | 2         | 2.581989    | 2.903979378  | 0          | 1223    | EEF1G    | 200689. x. at  | -0.7746  | -2        | 2.581989    | 0.261712    |            |
| 8266  | NPR2      | 214066. x. at  | 0.774597 | 2         | 2.581989    | 2.844799119  | 0          | 1562    | RPS18    | 201049. s. at  | -0.7746  | -2        | 2.581989    | 0.265146    |            |
| 2265  | PRG1      | 201858. s. at  | 0.774597 | 2         | 2.581989    | 2.812820761  | 0          | 9034    | GAPDH    | 217398. x. at  | -0.7746  | -2        | 2.581989    | 0.268539    |            |
| 876   | LENG10    | 1564776. at    | 0.774597 | 2         | 2.581989    | 2.806422837  | 0          | 14742   | PLEKHK1  | 230469. at     | -0.7746  | -2        | 2.581989    | 0.268568    |            |
| 12437 | H19       | 224997. x. at  | 0.774597 | 2         | 2.581989    | 2.799081995  | 0          | 316     | FAM13C1  | 1554547. at    | -0.7746  | -2        | 2.581989    | 0.269231    |            |
| 3779  | SGNE1     | 203889. at     | 0.774597 | 2         | 2.581989    | 2.772605671  | 0          | 1900    | VIM      | 201426. s. at  | -0.7746  | -2        | 2.581989    | 0.269677    |            |
| 14263 | NRXN1     | 228547. at     | 0.774597 | 2         | 2.581989    | 2.766990291  | 0          | 5622    | HLA-DRA  | 208894. at     | -0.7746  | -2        | 2.581989    | 0.27177     |            |
| 307   | RAD51L1   | 1554496. at    | 0.774597 | 2         | 2.581989    | 2.763474621  | 0          | 5959    | HLA-DRB1 | 209312. x. at  | -0.7746  | -2        | 2.581989    | 0.273       |            |
| 8360  | RPS9      | 214317. x. at  | 0.774597 | 2         | 2.581989    | 2.743260563  | 0          | 8365    | TNFSF10  | 214329. x. at  | -0.7746  | -2        | 2.581989    | 0.274583    |            |
| 795   | NDFP2     | 1560631. at    | 0.774597 | 2         | 2.581989    | 2.727571392  | 0          | 215193  | x. at    | 215193. x. at  | -0.7746  | -2        | 2.581989    | 0.277305    |            |
| 8920  | LOC346735 | 216635. at     | 0.774597 | 2         | 2.581989    | 2.654717619  | 0          | 227026  | at       | 227026. at     | -0.7746  | -2        | 2.581989    | 0.281106    |            |
| 6612  | NF2       | 210767. at     | 0.774597 | 2         | 2.581989    | 2.644012945  | 0          | 7644    | FTL      | 212786. x. at  | -0.7746  | -2        | 2.581989    | 0.282332    |            |
| 8137  | KRTHB1    | 213711. at     | 0.774597 | 2         | 2.581989    | 2.636241611  | 0          | 6789    | UBC      | 211296. x. at  | -0.7746  | -2        | 2.581989    | 0.282332    |            |
| 671   | DDX3X     | 1558120. at    | 0.774597 | 2         | 2.581989    | 2.611475976  | 0          | 7026    | RPLP0    | 211972. x. at  | -0.7746  | -2        | 2.581989    | 0.283284    |            |
| 10855 | HSPB8     | 221667. s. at  | 0.774597 | 2         | 2.581989    | 2.610076456  | 0          | 8024    | GAPDH    | 213453. x. at  | -0.7746  | -2        | 2.581989    | 0.284515    |            |
| 15808 | GPRT10    | 238689. at     | 0.774597 | 2         | 2.581989    | 2.609238845  | 0          | 201105  | at       | 201105. at     | -0.7746  | -2        | 2.581989    | 0.284707    |            |
| 1022  | ZNF709    | 1570366. x. at | 0.774597 | 2         | 2.581989    | 2.606763285  | 0          | 200650  | s. at    | 200650. s. at  | -0.7746  | -2        | 2.581989    | 0.288088    |            |
| 15261 | HHLA2     | 234624. at     | 0.774597 | 2         | 2.581989    | 2.590939824  | 0          | 1553569 | at       | 1553569. at    | -0.7746  | -2        | 2.581989    | 0.289783    |            |
| 12085 | DDI2      | 224449. at     | 0.774597 | 2         | 2.581989    | 2.588112617  | 0          | 213477  | x. at    | 213477. x. at  | -0.7746  | -2        | 2.581989    | 0.290419    |            |
| 364   | NGA1      | 1554840. at    | 0.774597 | 2         | 2.581989    | 2.57970451   | 0          | 8035    | EEF1A1   | 213477. x. at  | -0.7746  | -2        | 2.581989    | 0.296763    |            |
| 16150 | ZNF254    | 242602. x. at  | 0.774597 | 2         | 2.581989    | 2.578665145  | 0          | 6471    | HSPA8    | 210338. s. at  | -0.7746  | -2        | 2.581989    | 0.297815    |            |
| 716   | CCDC32    | 1558648. at    | 0.774597 | 2         | 2.581989    | 2.553836663  | 0          | 16602   | ACTB     | 1553570. x. at | -0.7746  | -2        | 2.581989    | 0.298149    |            |
| 627   | ATP6V1H   | 1557586. s. at | 0.774597 | 2         | 2.581989    | 2.544738914  | 0          | 224930  | x. at    | 224930. x. at  | -0.7746  | -2        | 2.581989    | 0.298675    |            |
| 8377  | CYP2C9    | 214421. x. at  | 0.774597 | 2         | 2.581989    | 2.532291667  | 0          | 7045    | ACTG1    | 211995. x. at  | -0.7746  | -2        | 2.581989    | 0.298675    |            |
| 10515 | MYO15A    | 220288. at     | 0.774597 | 2         | 2.581989    | 2.530909091  | 0          | 5588    | RPLP0    | 208856. x. at  | -0.7746  | -2        | 2.581989    | 0.298742    |            |
| 14545 | FXR1      | 229519. at     | 0.774597 | 2         | 2.581989    | 2.524549277  | 0          | 1549    | RPLP0    | 201033. x. at  | -0.7746  | -2        | 2.581989    | 0.29919     |            |
| 4872  | CYP24A1   | 206504. at     | 0.774597 | 2         | 2.581989    | 2.523628049  | 0          | 3247    | RPS2     | 203107. x. at  | -0.7746  | -2        | 2.581989    | 0.299962    |            |
| 6222  | PSG6      | 209738. x. at  | 0.774597 | 2         | 2.581989    | 2.492054149  | 0          | 2949    | TNFSF10  | 202687. s. at  | -0.7746  | -2        | 2.581989    | 0.300071    |            |
| 118   | ATP6V0D2  | 1553153. at    | 0.774597 | 2         | 2.581989    | 2.4891190493 | 0          | 3191    | RPL27A   | 203034. s. at  | -0.7746  | -2        | 2.581989    | 0.301135    |            |
| 906   | FBXO9     | 1566507. a. at | 0.774597 | 2         | 2.581989    | 2.462123958  | 0          | 200819  | s. at    | 200819. s. at  | -0.7746  | -2        | 2.581989    | 0.303024    |            |
| 11984 | SPANXA1   | 224032. x. at  | 0.774597 | 2         | 2.581989    | 2.427607467  | 0          | 1348    | RPS15    | 200819. s. at  | -0.7746  | -2        | 2.581989    | 0.303024    |            |
| 8758  | HAB1      | 215778. x. at  | 0.774597 | 2         | 2.581989    | 2.425170732  | 0          | 6922    | RPLP0    | 211720. x. at  | -0.7746  | -2        | 2.581989    | 0.304079    |            |
| 10556 | C10ORF59  | 220564. at     | 0.774597 | 2         | 2.581989    | 2.421694089  | 0          | 16600   | ACTB     | 1553570. x. at | -0.7746  | -2        | 2.581989    | 0.30514     |            |
| 5061  | SLOC1A2   | 207308. at     | 0.774597 | 2         | 2.581989    | 2.408256881  | 0          | 208645  | s. at    | 208645. s. at  | -0.7746  | -2        | 2.581989    | 0.307806    |            |
| 8963  | SPAM1     | 216989. at     | 0.774597 | 2         | 2.581989    | 2.405177994  | 0          | 5398    | RPS14    | 208645. s. at  | -0.7746  | -2        | 2.581989    | 0.307806    |            |
| 8621  | DNPEP     | 215135. at     | 0.774597 | 2         | 2.581989    | 2.395874541  | 0          | 15900   | THBS1    | 239336. at     | -0.7746  | -2        | 2.581989    | 0.308558    |            |
| 4089  | MAOA      | 204388. s. at  | 0.774597 | 2         | 2.581989    | 2.383668271  | 0          | 7405    | FNI      | 212464. s. at  | -0.7746  | -2        | 2.581989    | 0.310442    |            |
| 350   | PVT1      | 1554766. s. at | 0.774597 | 2         | 2.581989    | 2.374354561  | 0          | 200933  | x. at    | 200933. x. at  | -0.7746  | -2        | 2.581989    | 0.310633    |            |
|       |           |                |          |           |             |              |            | 15816   | EG1      | 238766. at     | -0.7746  | -2        | 2.581989    | 0.310677    |            |

**Negative genes (1139)**

|                 |          |            |             |             |             |                |             |         |         |          |          |          |   |
|-----------------|----------|------------|-------------|-------------|-------------|----------------|-------------|---------|---------|----------|----------|----------|---|
| 8467 BCE-1      | 0.774597 | 2 2.581989 | 2.369739479 | 0           | 1330 ACTB   | 200801         | x.at        | -0.7746 | -2      | 2.581989 | 0.311459 | 0        |   |
| 8977 LOC646912  | 217092   | x.at       | 2.581989    | 2.365904901 | 0           | 7602 RPL13     | 212734      | x.at    | -0.7746 | -2       | 2.581989 | 0.31188  | 0 |
| 15566 CDK9      | 236023   | at         | 0.774597    | 2.581989    | 2.361869650 | 1959 RPL41     | 201492      | s.at    | -0.7746 | -2       | 2.581989 | 0.31238  | 0 |
| 14368 DERL3     | 228897   | at         | 0.774597    | 2.581989    | 2.358965146 | 14556 RPL10A   | 229563      | s.at    | -0.7746 | -2       | 2.581989 | 0.312514 | 0 |
| 136 WDR64       | 1553373  | at         | 0.774597    | 2.581989    | 2.344152745 | 1168 UBB       | 200633      | at      | -0.7746 | -2       | 2.581989 | 0.312569 | 0 |
| 4711 CPA4       | 205832   | at         | 0.774597    | 2.581989    | 2.33574582  | 3571 C10ORF116 | 203571      | s.at    | -0.7746 | -2       | 2.581989 | 0.314561 | 0 |
| 8996 MUC5AC     | 217182   | at         | 0.774597    | 2.581989    | 2.329885877 | 1363 RPS21     | 200834      | s.at    | -0.7746 | -2       | 2.581989 | 0.315006 | 0 |
| 14011 GPR27     | 227769   | at         | 0.774597    | 2.581989    | 2.328580285 | 4333 EEF1A1    | 204892      | x.at    | -0.7746 | -2       | 2.581989 | 0.316663 | 0 |
| 768 PTD012      | 1559623  | at         | 0.774597    | 2.581989    | 2.326171292 | 16605 GAPDH    | AFFX-HJMGAP |         | -0.7746 | -2       | 2.581989 | 0.316933 | 0 |
| 620 ABC9        | 1557374  | at         | 0.774597    | 2.581989    | 2.304520222 | 12134 ACTG1    | 224565      | x.at    | -0.7746 | -2       | 2.581989 | 0.317429 | 0 |
| 16169 MOB1      | 242765   | at         | 0.774597    | 2.581989    | 2.302580999 | 1059 RPL27     | 200025      | s.at    | -0.7746 | -2       | 2.581989 | 0.317781 | 0 |
| 1556 DUSP1      | 201041   | s.at       | 0.774597    | 2.581989    | 2.298916033 | 7192 MPT2A     | 212185      | x.at    | -0.7746 | -2       | 2.581989 | 0.318505 | 0 |
| 15286 SNTG1     | 234919   | s.at       | 0.774597    | 2.581989    | 2.293901543 | 8008 RPS19     | 213414      | s.at    | -0.7746 | -2       | 2.581989 | 0.319414 | 0 |
| 16079 FLJ40906  | 242131   | at         | 0.774597    | 2.581989    | 2.268841967 | 1249 RPL13A    | 200716      | x.at    | -0.7746 | -2       | 2.581989 | 0.320651 | 0 |
| 16230 SYT6      | 244227   | at         | 0.774597    | 2.581989    | 2.254836759 | 8192 ACTB      | 213867      | x.at    | -0.7746 | -2       | 2.581989 | 0.32135  | 0 |
| 8656 SLC12A3    | 215274   | at         | 0.774597    | 2.581989    | 2.253884047 | 14007 PCSK9    | 227759      | at      | -0.7746 | -2       | 2.581989 | 0.321949 | 0 |
| 758 ADAM23      | 1559268  | at         | 0.774597    | 2.581989    | 2.251448436 | 1108 OAZ1      | 200077      | s.at    | -0.7746 | -2       | 2.581989 | 0.323934 | 0 |
| 8828 NEK1       | 216213   | at         | 0.774597    | 2.581989    | 2.247391952 | 6816 PPIA      | 211378      | x.at    | -0.7746 | -2       | 2.581989 | 0.32432  | 0 |
| 803 MGCA266     | 1560874  | at         | 0.774597    | 2.581989    | 2.229889751 | 5852 AKR1C3    | 209160      | at      | -0.7746 | -2       | 2.581989 | 0.324866 | 0 |
| 8935 CYLC1      | 216809   | at         | 0.774597    | 2.581989    | 2.219141021 | 7030 PPIA      | 211978      | x.at    | -0.7746 | -2       | 2.581989 | 0.325431 | 0 |
| 15733 LOC440552 | 238199   | x.at       | 0.774597    | 2.581989    | 2.21502477  | 6567 RPL13A    | 210646      | x.at    | -0.7746 | -2       | 2.581989 | 0.32687  | 0 |
| 10238 EGFL6     | 219454   | at         | 0.774597    | 2.581989    | 2.207300275 | 6917 TUBB      | 211714      | x.at    | -0.7746 | -2       | 2.581989 | 0.326972 | 0 |
| 682 LOC145783   | 1558202  | at         | 0.774597    | 2.581989    | 2.189476384 | 6948 PPIA      | 211765      | x.at    | -0.7746 | -2       | 2.581989 | 0.327779 | 0 |
| 10477 CBWD5     | 220175   | s.at       | 0.774597    | 2.581989    | 2.183152174 | 1784 PPIA      | 201293      | x.at    | -0.7746 | -2       | 2.581989 | 0.330465 | 0 |
| 8964 COL11A2    | 216993   | s.at       | 0.774597    | 2.581989    | 2.182847992 | 15936 VAPA     | 239750      | x.at    | -0.7746 | -2       | 2.581989 | 0.330679 | 0 |
| 12052 BEX2      | 224367   | at         | 0.774597    | 2.581989    | 2.184617742 | 1066 RPL9      | 200032      | s.at    | -0.7746 | -2       | 2.581989 | 0.33095  | 0 |
| 10420 BANP      | 219966   | x.at       | 0.774597    | 2.581989    | 2.184267782 | 12140 ACTB     | 224594      | x.at    | -0.7746 | -2       | 2.581989 | 0.332437 | 0 |
| 10684 TRIM49    | 221154   | at         | 0.774597    | 2.581989    | 2.178378378 | 12324 FKBP5    | 224840      | at      | -0.7746 | -2       | 2.581989 | 0.33285  | 0 |
| 6907 IGG HEAVY  | 211693   | at         | 0.774597    | 2.581989    | 2.164757412 | 7834 RPL23A    | 213084      | x.at    | -0.7746 | -2       | 2.581989 | 0.332997 | 0 |
| 11717 TXNDC11   | 223325   | at         | 0.774597    | 2.581989    | 2.162847682 | 9108 TMSB10    | 217733      | s.at    | -0.7746 | -2       | 2.581989 | 0.335349 | 0 |
| 5227 GLRA1      | 207972   | at         | 0.774597    | 2.581989    | 2.155779392 | 9114 RPL7A     | 217740      | x.at    | -0.7746 | -2       | 2.581989 | 0.335898 | 0 |
| 11918 NIPSNAP3B | 223764   | x.at       | 0.774597    | 2.581989    | 2.151744186 | 1902 RPL37A    | 201429      | s.at    | -0.7746 | -2       | 2.581989 | 0.336648 | 0 |
| 16583 WNT6      | 71933    | at         | 0.774597    | 2.581989    | 2.15059922  | 1450 RPS23     | 200926      | at      | -0.7746 | -2       | 2.581989 | 0.33707  | 0 |
| 14655 SAMD9L    | 230036   | at         | 0.774597    | 2.581989    | 2.137556321 | 1752 RPS3A     | 201257      | x.at    | -0.7746 | -2       | 2.581989 | 0.33771  | 0 |
| 895 NADSYN1     | 1565906  | at         | 0.774597    | 2.581989    | 2.136833731 | 10341 MNS1     | 219703      | at      | -0.7746 | -2       | 2.581989 | 0.341637 | 0 |
| 10549 HAMP      | 220491   | at         | 0.774597    | 2.581989    | 2.131642512 | 5440 RPS3      | 208592      | at      | -0.7746 | -2       | 2.581989 | 0.34286  | 0 |
| 908 DPYSL5      | 1566577  | at         | 0.774597    | 2.581989    | 2.128121284 | 9103 S100A6    | 217728      | at      | -0.7746 | -2       | 2.581989 | 0.3433   | 0 |
| 6614 PPARA      | 210771   | at         | 0.774597    | 2.581989    | 2.122006326 | 16603 ALU      | AFFX-hum1   | alu     | -0.7746 | -2       | 2.581989 | 0.344903 | 0 |
| 8699 KIAA1473   | 1570070  | at         | 0.774597    | 2.581989    | 2.115392215 | 8096 EEF1A1    | 213614      | x.at    | -0.7746 | -2       | 2.581989 | 0.345373 | 0 |
| 163 CDYL2       | 215532   | x.at       | 0.774597    | 2.581989    | 2.11274935  | 5564 RPL23A    | 208825      | x.at    | -0.7746 | -2       | 2.581989 | 0.345987 | 0 |
| 8890 HNRPA1     | 1553647  | at         | 0.774597    | 2.581989    | 2.109112841 | 12421 FAM46A   | 224973      | at      | -0.7746 | -2       | 2.581989 | 0.348885 | 0 |
| 8434 ATP8B1     | 216497   | at         | 0.774597    | 2.581989    | 2.107843137 | 5573 RPL23A    | 208834      | x.at    | -0.7746 | -2       | 2.581989 | 0.349271 | 0 |
| 1018 FMN1       | 214594   | x.at       | 0.774597    | 2.581989    | 2.10743137  | 11434 NRP2     | 222877      | at      | -0.7746 | -2       | 2.581989 | 0.352731 | 0 |
| 9091 STMN1      | 1570156  | s.at       | 0.774597    | 2.581989    | 2.091779465 | 5630 RPS28     | 208904      | s.at    | -0.7746 | -2       | 2.581989 | 0.353665 | 0 |
| 10637 CTAGE1    | 220957   | at         | 0.774597    | 2.581989    | 2.083690987 | 7346 RPS3A     | 212391      | x.at    | -0.7746 | -2       | 2.581989 | 0.35585  | 0 |
| 148 TAS2R50     | 1553561  | at         | 0.774597    | 2.581989    | 2.06422569  | 12104 MGC12916 | 224508      | at      | -0.7746 | -2       | 2.581989 | 0.356516 | 0 |
| 5034 CD80       | 207176   | s.at       | 0.774597    | 2.581989    | 2.073711121 | 1125 RPS10     | 200095      | x.at    | -0.7746 | -2       | 2.581989 | 0.362802 | 0 |
| 4697 DUSP9      | 205777   | at         | 0.774597    | 2.581989    | 2.06852638  | 2730 GSF3      | 202421      | at      | -0.7746 | -2       | 2.581989 | 0.362802 | 0 |
| 10727 VNI1R1    | 221412   | at         | 0.774597    | 2.581989    | 2.06422569  | 10759 HLA-DRB3 | 221491      | x.at    | -0.7746 | -2       | 2.581989 | 0.363348 | 0 |
| 797 ALG5        | 1560733  | at         | 0.774597    | 2.581989    | 2.059386179 | 8880 FNI       | 216442      | x.at    | -0.7746 | -2       | 2.581989 | 0.363783 | 0 |
| 3716 MRPL33     | 203781   | at         | 0.774597    | 2.581989    | 2.058945466 | 14484 KIAA0379 | 229307      | at      | -0.7746 | -2       | 2.581989 | 0.371144 | 0 |
| 15669 ASXL2     | 237095   | at         | 0.774597    | 2.581989    | 2.053208556 | 6861 RPS10     | 229088      | at      | -0.7746 | -2       | 2.581989 | 0.373275 | 0 |
| 575 LOC284219   | 1556425  | a.at       | 0.774597    | 2.581989    | 2.053208556 | 12055 MT-ND4   | 224372      | at      | -0.7746 | -2       | 2.581989 | 0.374584 | 0 |
| 15252 OR51B2    | 234486   | at         | 0.774597    | 2.581989    | 2.050998311 | 9584 PEL11     | 218319      | at      | -0.7746 | -2       | 2.581989 | 0.374908 | 0 |
| 623 LOC339005   | 1557450  | s.at       | 0.774597    | 2.581989    | 2.048971332 | 6821 FNI       | 211719      | x.at    | -0.7746 | -2       | 2.581989 | 0.375726 | 0 |
| 4852 USP6       | 206405   | x.at       | 0.774597    | 2.581989    | 2.047799697 | 13191 RPS16    | 226131      | s.at    | -0.7746 | -2       | 2.581989 | 0.376217 | 0 |



|       |           |          |   |          |             |   |       |           |              |         |    |          |          |   |
|-------|-----------|----------|---|----------|-------------|---|-------|-----------|--------------|---------|----|----------|----------|---|
| 11981 | HIPK2     | 0.774597 | 2 | 2.581989 | 1.902345742 | 0 | 1294  | RPLP1     | 200763 s.at  | -0.7746 | -2 | 2.581989 | 0.440266 | 0 |
| 2266  | PRG1      | 0.774597 | 2 | 2.581989 | 1.901808095 | 0 | 10525 | MTHFD2L   | 220346.at    | -0.7746 | -2 | 2.581989 | 0.441313 | 0 |
| 4481  | RIN1      | 0.774597 | 2 | 2.581989 | 1.90026642  | 0 | 9066  | MGC15606  | 217540.at    | -0.7746 | -2 | 2.581989 | 0.442289 | 0 |
| 308   | RG57      | 0.774597 | 2 | 2.581989 | 1.899138991 | 0 | 14982 | AGPAT5    | 232007.at    | -0.7746 | -2 | 2.581989 | 0.442927 | 0 |
| 16404 | ADRBK1    | 0.774597 | 2 | 2.581989 | 1.898998295 | 0 | 1118  | RPL12     | 200088 x.at  | -0.7746 | -2 | 2.581989 | 0.443221 | 0 |
| 15109 | LOC149692 | 0.774597 | 2 | 2.581989 | 1.897986577 | 0 | 7041  | HPLA-DPA1 | 211990.at    | -0.7746 | -2 | 2.581989 | 0.443358 | 0 |
| 2593  | RAB13     | 0.774597 | 2 | 2.581989 | 1.897746326 | 0 | 70    | PODHGC3   | 1552735.at   | -0.7746 | -2 | 2.581989 | 0.443362 | 0 |
| 315   | APOBEC4   | 0.774597 | 2 | 2.581989 | 1.897698849 | 0 | 156   | MT-ND3    | 1553588.at   | -0.7746 | -2 | 2.581989 | 0.444877 | 0 |
| 14751 | PRKCBP1   | 0.774597 | 2 | 2.581989 | 1.895877812 | 0 | 16001 | DARP      | 214321.at    | -0.7746 | -2 | 2.581989 | 0.445482 | 0 |
| 14985 | LENG1     | 0.774597 | 2 | 2.581989 | 1.895296872 | 0 | 13266 | ZNF358    | 226260 x.at  | -0.7746 | -2 | 2.581989 | 0.446112 | 0 |
| 467   | LOC728285 | 0.774597 | 2 | 2.581989 | 1.891501939 | 0 | 2114  | GJA1      | 201667.at    | -0.7746 | -2 | 2.581989 | 0.446262 | 0 |
| 3992  | FCER1G    | 0.774597 | 2 | 2.581989 | 1.889442541 | 0 | 15430 | LOC148530 | 222996 s.at  | -0.7746 | -2 | 2.581989 | 0.454037 | 0 |
| 13710 | LOC440104 | 0.774597 | 2 | 2.581989 | 1.887534341 | 0 | 11414 | AYTL1     | 222833.at    | -0.7746 | -2 | 2.581989 | 0.45427  | 0 |
| 15907 | LOC285620 | 0.774597 | 2 | 2.581989 | 1.886002886 | 0 | 8522  | SENP6     | 214790.at    | -0.7746 | -2 | 2.581989 | 0.454665 | 0 |
| 10448 | XAGE1     | 0.774597 | 2 | 2.581989 | 1.884015287 | 0 | 15529 | UGCG2     | 235749.at    | -0.7746 | -2 | 2.581989 | 0.455422 | 0 |
| 10831 | PIPOX     | 0.774597 | 2 | 2.581989 | 1.883235005 | 0 | 16604 | GAPDH     | 218437 s.at  | -0.7746 | -2 | 2.581989 | 0.455494 | 0 |
| 14748 | EVA1      | 0.774597 | 2 | 2.581989 | 1.882861502 | 0 | 9604  | GAPDH     | 204151 x.at  | -0.7746 | -2 | 2.581989 | 0.456085 | 0 |
| 6287  | CRADD     | 0.774597 | 2 | 2.581989 | 1.881831811 | 0 | 14741 | HS2ST1    | 230465.at    | -0.7746 | -2 | 2.581989 | 0.45641  | 0 |
| 630   | FLJ32704  | 0.774597 | 2 | 2.581989 | 1.879456706 | 0 | 7348  | KIAA0090  | 212396 s.at  | -0.7746 | -2 | 2.581989 | 0.457662 | 0 |
| 4013  | PSEN2     | 0.774597 | 2 | 2.581989 | 1.879438481 | 0 | 10643 | SFXN3     | 220974 x.at  | -0.7746 | -2 | 2.581989 | 0.461938 | 0 |
| 15956 | MSRA      | 0.774597 | 2 | 2.581989 | 1.879345603 | 0 | 8355  | OPA1      | 214306.at    | -0.7746 | -2 | 2.581989 | 0.462442 | 0 |
| 6047  | SPON1     | 0.774597 | 2 | 2.581989 | 1.878423729 | 0 | 14682 | RBBP1     | 230141.at    | -0.7746 | -2 | 2.581989 | 0.463066 | 0 |
| 10680 | NIPSNAP3B | 0.774597 | 2 | 2.581989 | 1.870538838 | 0 | 8531  | BRWD1     | 214820.at    | -0.7746 | -2 | 2.581989 | 0.463445 | 0 |
| 970   | LZTS1     | 0.774597 | 2 | 2.581989 | 1.861334071 | 0 | 473   | AP1S3     | 1555733 s.at | -0.7746 | -2 | 2.581989 | 0.463837 | 0 |
| 802   | PENK      | 0.774597 | 2 | 2.581989 | 1.860741445 | 0 | 5517  | PSMD11    | 208776.at    | -0.7746 | -2 | 2.581989 | 0.465789 | 0 |
| 13563 | ADAM12    | 0.774597 | 2 | 2.581989 | 1.860626345 | 0 | 7782  | KIAA1794  | 213008.at    | -0.7746 | -2 | 2.581989 | 0.466127 | 0 |
| 4253  | SLC29A2   | 0.774597 | 2 | 2.581989 | 1.859668357 | 0 | 7468  | CAP2      | 212551.at    | -0.7746 | -2 | 2.581989 | 0.466218 | 0 |
| 10367 | FLJ22965  | 0.774597 | 2 | 2.581989 | 1.857720836 | 0 | 8425  | MAP1B     | 214577.at    | -0.7746 | -2 | 2.581989 | 0.466223 | 0 |
| 6703  | ALDH3B1   | 0.774597 | 2 | 2.581989 | 1.857720836 | 0 | 6236  | CHRDL1    | 209763.at    | -0.7746 | -2 | 2.581989 | 0.466408 | 0 |
| 16035 | UQCRC2    | 0.774597 | 2 | 2.581989 | 1.857720836 | 0 | 1990  | EIFA41    | 201530 x.at  | -0.7746 | -2 | 2.581989 | 0.466443 | 0 |
| 721   | LOC158960 | 0.774597 | 2 | 2.581989 | 1.850939658 | 0 | 11    | PXK       | 1552274.at   | -0.7746 | -2 | 2.581989 | 0.466635 | 0 |
| 6559  | LTBP4     | 0.774597 | 2 | 2.581989 | 1.850327211 | 0 | 9308  | TM7SF3    | 210495 x.at  | -0.7746 | -2 | 2.581989 | 0.467403 | 0 |
| 15997 | CDORF23   | 0.774597 | 2 | 2.581989 | 1.845172031 | 0 | 6510  | FN1       | 213839.at    | -0.7746 | -2 | 2.581989 | 0.467959 | 0 |
| 830   | TXNDC6    | 0.774597 | 2 | 2.581989 | 1.843874912 | 0 | 8179  | CLMN      | 213839.at    | -0.7746 | -2 | 2.581989 | 0.469105 | 0 |
| 15266 | RAB28     | 0.774597 | 2 | 2.581989 | 1.843220339 | 0 | 13149 | ARRDC2    | 226055.at    | -0.7746 | -2 | 2.581989 | 0.471468 | 0 |
| 470   | CD209     | 0.774597 | 2 | 2.581989 | 1.842989571 | 0 | 15423 | FLJ12505  | 235343.at    | -0.7746 | -2 | 2.581989 | 0.471528 | 0 |
| 405   | WNK3      | 0.774597 | 2 | 2.581989 | 1.839926378 | 0 | 11945 | SCARA3    | 223843.at    | -0.7746 | -2 | 2.581989 | 0.472183 | 0 |
| 5324  | MID2      | 0.774597 | 2 | 2.581989 | 1.839633596 | 0 | 12398 | PAPPA     | 224942.at    | -0.7746 | -2 | 2.581989 | 0.474472 | 0 |
| 16363 | ANGEL1    | 0.774597 | 2 | 2.581989 | 1.839147999 | 0 | 782   | FRMD4A    | 1560031.at   | -0.7746 | -2 | 2.581989 | 0.474807 | 0 |
| 1004  | LOC344806 | 0.774597 | 2 | 2.581989 | 1.838915447 | 0 | 12431 | CGORF89   | 224987.at    | -0.7746 | -2 | 2.581989 | 0.47532  | 0 |
| 755   | E2-EPF    | 0.774597 | 2 | 2.581989 | 1.83699187  | 0 | 9892  | WARS2     | 218766 s.at  | -0.7746 | -2 | 2.581989 | 0.478038 | 0 |
| 5908  | PEG3      | 0.774597 | 2 | 2.581989 | 1.83677713  | 0 | 3852  | SH3YL1    | 204019 s.at  | -0.7746 | -2 | 2.581989 | 0.478954 | 0 |
| 15160 | CDH26     | 0.774597 | 2 | 2.581989 | 1.834320875 | 0 | 3519  | LRRRC14   | 203495.at    | -0.7746 | -2 | 2.581989 | 0.479244 | 0 |
| 15786 | MGC61599  | 0.774597 | 2 | 2.581989 | 1.833133253 | 0 | 819   | HS3ST3B1  | 1561908 a.at | -0.7746 | -2 | 2.581989 | 0.48037  | 0 |
| 345   | MCTP1     | 0.774597 | 2 | 2.581989 | 1.830856186 | 0 | 1036  | RPL36     | 200002.at    | -0.7746 | -2 | 2.581989 | 0.480399 | 0 |
| 4906  | SSX1      | 0.774597 | 2 | 2.581989 | 1.829662594 | 0 | 16174 | MAML3     | 242794.at    | -0.7746 | -2 | 2.581989 | 0.480493 | 0 |
| 925   | BDNFOS    | 0.774597 | 2 | 2.581989 | 1.829225352 | 0 | 8036  | KIAA1026  | 213478.at    | -0.7746 | -2 | 2.581989 | 0.480503 | 0 |
| 8943  | ATP8B2    | 0.774597 | 2 | 2.581989 | 1.827734711 | 0 | 14388 | C1ORF139  | 228949.at    | -0.7746 | -2 | 2.581989 | 0.481061 | 0 |
| 14196 | CLDN11    | 0.774597 | 2 | 2.581989 | 1.826659039 | 0 | 5914  | TUBA6     | 209251 x.at  | -0.7746 | -2 | 2.581989 | 0.482296 | 0 |
| 10612 | GTDC1     | 0.774597 | 2 | 2.581989 | 1.826185102 | 0 | 15795 | RAP2B     | 238622.at    | -0.7746 | -2 | 2.581989 | 0.483647 | 0 |
| 8255  | LOC339047 | 0.774597 | 2 | 2.581989 | 1.826185102 | 0 | 3341  | ATXN1     | 203232 s.at  | -0.7746 | -2 | 2.581989 | 0.484009 | 0 |
| 5430  | MAGED2    | 0.774597 | 2 | 2.581989 | 1.825571895 | 0 | 4629  | TAGLN     | 205547 s.at  | -0.7746 | -2 | 2.581989 | 0.484222 | 0 |
| 847   | LOC91149  | 0.774597 | 2 | 2.581989 | 1.823187105 | 0 | 14788 | FLJ33761  | 230747 s.at  | -0.7746 | -2 | 2.581989 | 0.484411 | 0 |
| 15414 | FBN1      | 0.774597 | 2 | 2.581989 | 1.82306555  | 0 | 14771 | CLOCK     | 230657.at    | -0.7746 | -2 | 2.581989 | 0.485117 | 0 |
| 4437  | FGF13     | 0.774597 | 2 | 2.581989 | 1.822646365 | 0 | 13387 | PDK1      | 226452.at    | -0.7746 | -2 | 2.581989 | 0.485904 | 0 |



|                 |          |                |   |          |              |   |        |            |               |         |    |          |          |   |
|-----------------|----------|----------------|---|----------|--------------|---|--------|------------|---------------|---------|----|----------|----------|---|
| 15536 C1ORF48   | 0.774597 | 235799. at     | 2 | 2.581989 | 1.750180766  | 0 | 11948  | PCDHB10    | 223854. at    | -0.7746 | -2 | 2.581989 | 0.507093 | 0 |
| 11459 VSX1      | 0.774597 | 222972. at     | 0 | 2.581989 | 1.749497656  | 0 | 6855   | HLA-G      | 211530. x. at | -0.7746 | -2 | 2.581989 | 0.5074   | 0 |
| 424 ZNF479      | 0.774597 | 1555368. x. at | 0 | 2.581989 | 1.748865366  | 0 | 8077   | ATP11A     | 213582. at    | -0.7746 | -2 | 2.581989 | 0.50806  | 0 |
| 16431 FOXA2     | 0.774597 | 40284. at      | 0 | 2.581989 | 1.747622821  | 0 | 4466   | RBBP6      | 205178. s. at | -0.7746 | -2 | 2.581989 | 0.508916 | 0 |
| 14135 TGFβ2     | 0.774597 | 228121. at     | 0 | 2.581989 | 1.746354344  | 0 | 11392  | RBSN1      | 222791. at    | -0.7746 | -2 | 2.581989 | 0.509066 | 0 |
| 15800 WDFY3     | 0.774597 | 238660. at     | 0 | 2.581989 | 1.745841331  | 0 | 4037   | LOX        | 202498. s. at | -0.7746 | -2 | 2.581989 | 0.509317 | 0 |
| 869 SLC24A3     | 0.774597 | 1564444. at    | 0 | 2.581989 | 1.744825246  | 0 | 12726  | KLF13      | 225390. s. at | -0.7746 | -2 | 2.581989 | 0.509651 | 0 |
| 1017 LOC347034  | 0.774597 | 1570155. at    | 0 | 2.581989 | 1.743232988  | 0 | 13318  | MGC33202   | 226348. at    | -0.7746 | -2 | 2.581989 | 0.509608 | 0 |
| 4653 CDA        | 0.774597 | 205627. at     | 0 | 2.581989 | 1.741174195  | 0 | 10892  | MXR36      | 221748. s. at | -0.7746 | -2 | 2.581989 | 0.50995  | 0 |
| 7745 DYRK4      | 0.774597 | 212954. at     | 0 | 2.581989 | 1.740498985  | 0 | 731    | SMCHD1     | 1558747. at   | -0.7746 | -2 | 2.581989 | 0.509968 | 0 |
| 10541 BIRC7     | 0.774597 | 220451. s. at  | 0 | 2.581989 | 1.740411932  | 0 | 14729  | CHPT1      | 230364. at    | -0.7746 | -2 | 2.581989 | 0.51091  | 0 |
| 6545 SAT        | 0.774597 | 210592. s. at  | 0 | 2.581989 | 1.739694181  | 0 | 13850  | FZD8       | 227405. s. at | -0.7746 | -2 | 2.581989 | 0.51095  | 0 |
| 15219 KIAA1772  | 0.774597 | 233977. at     | 0 | 2.581989 | 1.739065234  | 0 | 16584  | RABEP2     | 74694. s. at  | -0.7746 | -2 | 2.581989 | 0.510971 | 0 |
| 14577 THRB      | 0.774597 | 229657. at     | 0 | 2.581989 | 1.738663484  | 0 | 9626   | FTS        | 118373. at    | -0.7746 | -2 | 2.581989 | 0.511421 | 0 |
| 5998 XPC        | 0.774597 | 208375. at     | 0 | 2.581989 | 1.738415739  | 0 | 14562  | ERDJ5      | 229588. at    | -0.7746 | -2 | 2.581989 | 0.511657 | 0 |
| 7895 TRBC1      | 0.774597 | 213193. x. at  | 0 | 2.581989 | 1.738231412  | 0 | 14618  | NMNAT1     | 229852. at    | -0.7746 | -2 | 2.581989 | 0.511926 | 0 |
| 11104 APTX      | 0.774597 | 222338. x. at  | 0 | 2.581989 | 1.738007764  | 0 | 14951  | KIAA1229   | 231909. x. at | -0.7746 | -2 | 2.581989 | 0.512425 | 0 |
| 8970 KPNB1      | 0.774597 | 217027. x. at  | 0 | 2.581989 | 1.736675462  | 0 | 13830  | HS3ST3B1   | 227361. at    | -0.7746 | -2 | 2.581989 | 0.51267  | 0 |
| 5200 ID3        | 0.774597 | 207826. s. at  | 0 | 2.581989 | 1.7360082696 | 0 | 2759   | GTF2H1     | 202453. s. at | -0.7746 | -2 | 2.581989 | 0.512727 | 0 |
| 12858 SH3MD2    | 0.774597 | 225589. at     | 0 | 2.581989 | 1.733747424  | 0 | 9523   | SUV420H1   | 118242. s. at | -0.7746 | -2 | 2.581989 | 0.512982 | 0 |
| 10723 KCNIP1    | 0.774597 | 221307. at     | 0 | 2.581989 | 1.731843575  | 0 | 12209  | MLLT4      | 224865. at    | -0.7746 | -2 | 2.581989 | 0.513574 | 0 |
| 965 SMARCA4     | 0.774597 | 1569073. x. at | 0 | 2.581989 | 1.730733083  | 0 | 9624   | PSPC1      | 218371. s. at | -0.7746 | -2 | 2.581989 | 0.514417 | 0 |
| 13097 C17ORF28  | 0.774597 | 225981. at     | 0 | 2.581989 | 1.729341317  | 0 | 14510  | C10ORF118  | 229399. at    | -0.7746 | -2 | 2.581989 | 0.51593  | 0 |
| 617 LOC285401   | 0.774597 | 1557369. a. at | 0 | 2.581989 | 1.728753853  | 0 | 15272  | FLJ13576   | 234726. s. at | -0.7746 | -2 | 2.581989 | 0.516092 | 0 |
| 5730 MAGED1     | 0.774597 | 209014. at     | 0 | 2.581989 | 1.727409235  | 0 | 2548   | LMK2       | 202193. at    | -0.7746 | -2 | 2.581989 | 0.516286 | 0 |
| 11113 COP21     | 0.774597 | 222386. s. at  | 0 | 2.581989 | 1.727334873  | 0 | 8605   | LRRCA2     | 215084. s. at | -0.7746 | -2 | 2.581989 | 0.516603 | 0 |
| 217 LARP2       | 0.774597 | 1554038. at    | 0 | 2.581989 | 1.727272727  | 0 | 15780  | FUT11      | 238551. at    | -0.7746 | -2 | 2.581989 | 0.518015 | 0 |
| 15063 PCCA      | 0.774597 | 232376. at     | 0 | 2.581989 | 1.723241159  | 0 | 16392  | ZFYVE26    | 37943. at     | -0.7746 | -2 | 2.581989 | 0.51816  | 0 |
| 16165 SREBF2    | 0.774597 | 1552482. at    | 0 | 2.581989 | 1.72251471   | 0 | 5417   | HMGN2      | 208668. x. at | -0.7746 | -2 | 2.581989 | 0.51906  | 0 |
| 36 RAPH1        | 0.774597 | 1552482. at    | 0 | 2.581989 | 1.71884347   | 0 | 4453   | CPNE2      | 225129. at    | -0.7746 | -2 | 2.581989 | 0.519671 | 0 |
| 10340 PLAC1     | 0.774597 | 219702. at     | 0 | 2.581989 | 1.716963657  | 0 | 15360  | TAF3       | 235119. at    | -0.7746 | -2 | 2.581989 | 0.519722 | 0 |
| 687 SF3B2       | 0.774597 | 1558230. at    | 0 | 2.581989 | 1.71664482   | 0 | 4022   | EDNRB      | 204273. at    | -0.7746 | -2 | 2.581989 | 0.520559 | 0 |
| 8903 HMG4L      | 0.774597 | 216548. x. at  | 0 | 2.581989 | 1.71664482   | 0 | 204273 | TAF3       | 156180. at    | -0.7746 | -2 | 2.581989 | 0.520794 | 0 |
| 878 EEA1        | 0.774597 | 1564798. at    | 0 | 2.581989 | 1.708987784  | 0 | 8678   | MGC10940   | 215436. at    | -0.7746 | -2 | 2.581989 | 0.520927 | 0 |
| 5099 AHCYL1     | 0.774597 | 207464. at     | 0 | 2.581989 | 1.708672087  | 0 | 14593  | DJ462O23.2 | 229735. s. at | -0.7746 | -2 | 2.581989 | 0.521129 | 0 |
| 14833 NIN2B3    | 0.774597 | 231092. s. at  | 0 | 2.581989 | 1.708559047  | 0 | 8204   | EMP1       | 213895. at    | -0.7746 | -2 | 2.581989 | 0.521249 | 0 |
| 12709 ESAM      | 0.774597 | 225369. at     | 0 | 2.581989 | 1.707398901  | 0 | 3459   | HES1       | 203395. s. at | -0.7746 | -2 | 2.581989 | 0.521536 | 0 |
| 15819 MGC26744  | 0.774597 | 238767. at     | 0 | 2.581989 | 1.706073753  | 0 | 673    | TNRC6B     | 1558142. at   | -0.7746 | -2 | 2.581989 | 0.521739 | 0 |
| 6384 FOXA2      | 0.774597 | 210103. s. at  | 0 | 2.581989 | 1.70486611   | 0 | 14270  | PAPOLA     | 228569. at    | -0.7746 | -2 | 2.581989 | 0.521945 | 0 |
| 16016 MGC72104  | 0.774597 | 241484. x. at  | 0 | 2.581989 | 1.704100946  | 0 | 11412  | GRHL1      | 222830. at    | -0.7746 | -2 | 2.581989 | 0.521965 | 0 |
| 14806 APBB1P    | 0.774597 | 1555289. at    | 0 | 2.581989 | 1.703417533  | 0 | 15626  | C6ORF52    | 236504. x. at | -0.7746 | -2 | 2.581989 | 0.522429 | 0 |
| 8992 MT1F       | 0.774597 | 230925. at     | 0 | 2.581989 | 1.702672039  | 0 | 13007  | C20ORF194  | 225825. at    | -0.7746 | -2 | 2.581989 | 0.522975 | 0 |
| 4763 ATP5F      | 0.774597 | 206031. s. at  | 0 | 2.581989 | 1.701434549  | 0 | 4561   | CBR3       | 205379. at    | -0.7746 | -2 | 2.581989 | 0.522982 | 0 |
| 16121 ATP5F1    | 0.774597 | 242398. x. at  | 0 | 2.581989 | 1.698465644  | 0 | 8791   | KIAA0090   | 215991. s. at | -0.7746 | -2 | 2.581989 | 0.523122 | 0 |
| 11725 ATP1F1    | 0.774597 | 223338. s. at  | 0 | 2.581989 | 1.698432202  | 0 | 5164   | PKRAA2     | 235710. at    | -0.7746 | -2 | 2.581989 | 0.523323 | 0 |
| 119 ATP6V0D2    | 0.774597 | 1553155. x. at | 0 | 2.581989 | 1.697980871  | 0 | 1094   | RPL30      | 200062. s. at | -0.7746 | -2 | 2.581989 | 0.523423 | 0 |
| 2323 DAF        | 0.774597 | 201926. s. at  | 0 | 2.581989 | 1.696123269  | 0 | 10597  | PPP4R2     | 220764. at    | -0.7746 | -2 | 2.581989 | 0.524407 | 0 |
| 3138 HCLS1      | 0.774597 | 202957. at     | 0 | 2.581989 | 1.694621696  | 0 | 15040  | C18ORF4    | 232235. at    | -0.7746 | -2 | 2.581989 | 0.524559 | 0 |
| 6291 RHOD       | 0.774597 | 208885. at     | 0 | 2.581989 | 1.693669082  | 0 | 4921   | IL7        | 206693. at    | -0.7746 | -2 | 2.581989 | 0.526113 | 0 |
| 15253 ADAMTS10  | 0.774597 | 234490. at     | 0 | 2.581989 | 1.692760181  | 0 | 15415  | ARL6       | 235520. at    | -0.7746 | -2 | 2.581989 | 0.526208 | 0 |
| 792 MARK1       | 0.774597 | 1560407. at    | 0 | 2.581989 | 1.690544413  | 0 | 11589  | C6ORF166   | 223143. s. at | -0.7746 | -2 | 2.581989 | 0.52687  | 0 |
| 15297 LOC442262 | 0.774597 | 234954. at     | 0 | 2.581989 | 1.690060659  | 0 | 12846  | LIFR       | 225571. at    | -0.7746 | -2 | 2.581989 | 0.527328 | 0 |
| 8373 CTRL       | 0.774597 | 214337. s. at  | 0 | 2.581989 | 1.68878185   | 0 | 9877   | PACSN3     | 218744. s. at | -0.7746 | -2 | 2.581989 | 0.527424 | 0 |
| 14698 KIAA1501  | 0.774597 | 230196. x. at  | 0 | 2.581989 | 1.688561721  | 0 | 14466  | LRRCS7     | 229232. at    | -0.7746 | -2 | 2.581989 | 0.528372 | 0 |
| 16188 RNF39     | 0.774597 | 242895. x. at  | 0 | 2.581989 | 1.688441462  | 0 | 14936  | MGC39518   | 231874. at    | -0.7746 | -2 | 2.581989 | 0.529388 | 0 |

|       |                          |              |          |          |             |              |                |              |         |    |          |          |   |
|-------|--------------------------|--------------|----------|----------|-------------|--------------|----------------|--------------|---------|----|----------|----------|---|
| 6829  | DKFZP586A052:211424_x.at | 0.774597     | 2        | 2.581989 | 1.687893082 | 0            | 183 LOC151194  | 1553743.at   | -0.7746 | -2 | 2.581989 | 0.529695 | 0 |
| 8599  | FLJ20331                 | 215063_x.at  | 0.774597 | 2        | 2.581989    | 1.686112545  | 971 PTD002     | 1569167.at   | -0.7746 | -2 | 2.581989 | 0.530387 | 0 |
| 9033  | UBEZNL                   | 217393_x.at  | 0.774597 | 2        | 2.581989    | 1.685689692  | 13529 FAM20C   | 226722.at    | -0.7746 | -2 | 2.581989 | 0.531495 | 0 |
| 3616  | CPT1A                    | 203633.at    | 0.774597 | 2        | 2.581989    | 1.685396463  | 14520 REFAP    | 229431.at    | -0.7746 | -2 | 2.581989 | 0.531698 | 0 |
| 13238 | MEG3                     | 228211.at    | 0.774597 | 2        | 2.581989    | 1.682557178  | 12946 SORBS2   | 225728.at    | -0.7746 | -2 | 2.581989 | 0.532619 | 0 |
| 8333  | DKK3                     | 214247_s.at  | 0.774597 | 2        | 2.581989    | 1.682466281  | 12243 ATPAF1   | 224729_s.at  | -0.7746 | -2 | 2.581989 | 0.532622 | 0 |
| 10620 | SPANXA1                  | 220922_s.at  | 0.774597 | 2        | 2.581989    | 1.681571787  | 4964 TNFSF9    | 206907.at    | -0.7746 | -2 | 2.581989 | 0.533984 | 0 |
| 7297  | CHMP7                    | 212313.at    | 0.774597 | 2        | 2.581989    | 1.680810433  | 15434 CHD9     | 235388.at    | -0.7746 | -2 | 2.581989 | 0.534844 | 0 |
| 15154 | LOC90834                 | 233321_x.at  | 0.774597 | 2        | 2.581989    | 1.680235672  | 14823 CAMK2D   | 231042_s.at  | -0.7746 | -2 | 2.581989 | 0.535746 | 0 |
| 8606  | C15ORF39                 | 215087.at    | 0.774597 | 2        | 2.581989    | 1.678745268  | 7735 LOC137886 | 212934.at    | -0.7746 | -2 | 2.581989 | 0.536192 | 0 |
| 3588  | FSTL3                    | 203592_s.at  | 0.774597 | 2        | 2.581989    | 1.677476677  | 16187 HELLS    | 242890.at    | -0.7746 | -2 | 2.581989 | 0.536258 | 0 |
| 7600  | MEG3                     | 212732.at    | 0.774597 | 2        | 2.581989    | 1.675771971  | 15950 RAB12    | 239891_x.at  | -0.7746 | -2 | 2.581989 | 0.536664 | 0 |
| 10609 | METTL5                   | 220839.at    | 0.774597 | 2        | 2.581989    | 1.674919063  | 4329 HUS1      | 204884_s.at  | -0.7746 | -2 | 2.581989 | 0.537409 | 0 |
| 250   | ALS2CR15                 | 1554205_s.at | 0.774597 | 2        | 2.581989    | 1.674347158  | 3107 FAM20B    | 202916_s.at  | -0.7746 | -2 | 2.581989 | 0.537467 | 0 |
| 15735 | C6ORF83                  | 238292.at    | 0.774597 | 2        | 2.581989    | 1.674301242  | 11321 C6ORF149 | 222872.at    | -0.7746 | -2 | 2.581989 | 0.537933 | 0 |
| 14976 | USP15                    | 231990.at    | 0.774597 | 2        | 2.581989    | 1.673205528  | 16425 MAST4    | 40016_q.at   | -0.7746 | -2 | 2.581989 | 0.538398 | 0 |
| 11710 | NTN4                     | 223315.at    | 0.774597 | 2        | 2.581989    | 1.673094779  | 10719 SYNC1    | 221276_s.at  | -0.7746 | -2 | 2.581989 | 0.538676 | 0 |
| 15052 | KLHL5                    | 232297.at    | 0.774597 | 2        | 2.581989    | 1.671810372  | 11411 PLDN     | 222826.at    | -0.7746 | -2 | 2.581989 | 0.539284 | 0 |
| 4072  | LIMK1                    | 204357_s.at  | 0.774597 | 2        | 2.581989    | 1.671019224  | 16454 CCHCR1   | 42361_q.at   | -0.7746 | -2 | 2.581989 | 0.539499 | 0 |
| 15736 | SIMP                     | 238303.at    | 0.774597 | 2        | 2.581989    | 1.670411985  | 9081 SOS2      | 217644_s.at  | -0.7746 | -2 | 2.581989 | 0.540215 | 0 |
| 7965  | STIP1                    | 213330_s.at  | 0.774597 | 2        | 2.581989    | 1.668572318  | 6957 NFYC      | 211797_s.at  | -0.7746 | -2 | 2.581989 | 0.540361 | 0 |
| 298   | BTBD15                   | 1554469.at   | 0.774597 | 2        | 2.581989    | 1.667744543  | 8126 MUC1      | 213693_s.at  | -0.7746 | -2 | 2.581989 | 0.540511 | 0 |
| 14281 | SGCD                     | 228602.at    | 0.774597 | 2        | 2.581989    | 1.666765667  | 8429 RSC1A1    | 202029_x.at  | -0.7746 | -2 | 2.581989 | 0.54087  | 0 |
| 10540 | CHST4                    | 220446_s.at  | 0.774597 | 2        | 2.581989    | 1.664670659  | 2405 RPL38     | 203957.at    | -0.7746 | -2 | 2.581989 | 0.541042 | 0 |
| 10608 | C21ORF77                 | 220826.at    | 0.774597 | 2        | 2.581989    | 1.664670659  | 3812 E2F6      | 213497.at    | -0.7746 | -2 | 2.581989 | 0.541303 | 0 |
| 3764  | ACTN2                    | 203864_s.at  | 0.774597 | 2        | 2.581989    | 1.664506481  | 8042 ABTB2     | 213497.at    | -0.7746 | -2 | 2.581989 | 0.541383 | 0 |
| 8640  | CALD1                    | 215198_s.at  | 0.774597 | 2        | 2.581989    | 1.663859112  | 7160 GFBP3     | 212143_s.at  | -0.7746 | -2 | 2.581989 | 0.541561 | 0 |
| 10310 | FLJ12649                 | 219626.at    | 0.774597 | 2        | 2.581989    | 1.663826879  | 16164 ATBF1    | 242738_s.at  | -0.7746 | -2 | 2.581989 | 0.542426 | 0 |
| 7169  | SDC2                     | 212158.at    | 0.774597 | 2        | 2.581989    | 1.663088483  | 254 ZNF638     | 1554249_a.at | -0.7746 | -2 | 2.581989 | 0.543133 | 0 |
| 997   | IQCH                     | 1569611_a.at | 0.774597 | 2        | 2.581989    | 1.66218035   | 15595 ITC      | 236235.at    | -0.7746 | -2 | 2.581989 | 0.543268 | 0 |
| 4999  | AOC2                     | 207064_s.at  | 0.774597 | 2        | 2.581989    | 1.662179908  | 9021 FOXJ3     | 217310_s.at  | -0.7746 | -2 | 2.581989 | 0.543325 | 0 |
| 10579 | C14ORF107                | 220701.at    | 0.774597 | 2        | 2.581989    | 1.661259228  | 9083 BCAP29    | 217657.at    | -0.7746 | -2 | 2.581989 | 0.543328 | 0 |
| 329   | SERPINB8                 | 1554616.at   | 0.774597 | 2        | 2.581989    | 1.65805564   | 1522 PRDX2     | 201006.at    | -0.7746 | -2 | 2.581989 | 0.543453 | 0 |
| 680   | FN1                      | 1568199.at   | 0.774597 | 2        | 2.581989    | 1.6566515227 | 574 TNRC5      | 1566389.at   | -0.7746 | -2 | 2.581989 | 0.543561 | 0 |
| 15805 | WDR36                    | 238677.at    | 0.774597 | 2        | 2.581989    | 1.655670376  | 8197 BBP       | 213882.at    | -0.7746 | -2 | 2.581989 | 0.544331 | 0 |
| 8241  | SAT                      | 213988_s.at  | 0.774597 | 2        | 2.581989    | 1.655315513  | 14684 BCAP29   | 230150.at    | -0.7746 | -2 | 2.581989 | 0.544402 | 0 |
| 3757  | IGFBP6                   | 203851.at    | 0.774597 | 2        | 2.581989    | 1.654170916  | 2569 FADS2     | 202218_s.at  | -0.7746 | -2 | 2.581989 | 0.546089 | 0 |
| 6501  | TANK                     | 210458_s.at  | 0.774597 | 2        | 2.581989    | 1.653719311  | 1208 RPL32     | 200674_s.at  | -0.7746 | -2 | 2.581989 | 0.546215 | 0 |
| 435   | SLC39A14                 | 1555433.at   | 0.774597 | 2        | 2.581989    | 1.653481894  | 12339 FKBP5    | 224856.at    | -0.7746 | -2 | 2.581989 | 0.546215 | 0 |
| 1001  | CCDC36                   | 1569690.at   | 0.774597 | 2        | 2.581989    | 1.65305785   | 10626 HZAFJ    | 220936_s.at  | -0.7746 | -2 | 2.581989 | 0.546838 | 0 |
| 9590  | LGR4                     | 218326_s.at  | 0.774597 | 2        | 2.581989    | 1.652742734  | 9856 SDPR      | 218711_s.at  | -0.7746 | -2 | 2.581989 | 0.547095 | 0 |
| 15651 | LOC146210                | 236776.at    | 0.774597 | 2        | 2.581989    | 1.652547156  | 4764 REL       | 206036_s.at  | -0.7746 | -2 | 2.581989 | 0.548097 | 0 |
| 231   | PRR8                     | 1554095.at   | 0.774597 | 2        | 2.581989    | 1.652344863  | 10213 KIAA1212 | 219387.at    | -0.7746 | -2 | 2.581989 | 0.548137 | 0 |
| 953   | LOC199998                | 1568938.at   | 0.774597 | 2        | 2.581989    | 1.651880424  | 12955 RAPGEF1  | 225738.at    | -0.7746 | -2 | 2.581989 | 0.548399 | 0 |
| 1178  | HDLBP                    | 200643.at    | 0.774597 | 2        | 2.581989    | 1.651531799  | 14421 DSCR1L2  | 229064_s.at  | -0.7746 | -2 | 2.581989 | 0.548519 | 0 |
| 10534 | TGFB2                    | 220407_s.at  | 0.774597 | 2        | 2.581989    | 1.649483066  | 224879.at      | 224879.at    | -0.7746 | -2 | 2.581989 | 0.548699 | 0 |
| 5053  | ABI2                     | 207268_x.at  | 0.774597 | 2        | 2.581989    | 1.648803144  | 226534.at      | 226534.at    | -0.7746 | -2 | 2.581989 | 0.548926 | 0 |
| 3792  | DNASE1L1                 | 203912_s.at  | 0.774597 | 2        | 2.581989    | 1.646782996  | 4973 NFIC      | 206929_s.at  | -0.7746 | -2 | 2.581989 | 0.548928 | 0 |
| 13473 | PHYHIP1                  | 228623.at    | 0.774597 | 2        | 2.581989    | 1.646482636  | 5828 SNAP23    | 209131_s.at  | -0.7746 | -2 | 2.581989 | 0.549097 | 0 |
| 16178 | BCAN                     | 242843.at    | 0.774597 | 2        | 2.581989    | 1.646386431  | 556 LOC283012  | 1556062.at   | -0.7746 | -2 | 2.581989 | 0.5497   | 0 |
| 9596  | BEX1                     | 218332.at    | 0.774597 | 2        | 2.581989    | 1.646172539  | 8680 LOX       | 215446_s.at  | -0.7746 | -2 | 2.581989 | 0.549776 | 0 |
| 945   | NCOR1                    | 1568748.at   | 0.774597 | 2        | 2.581989    | 1.64572863   | 10932 MYST1    | 221820_s.at  | -0.7746 | -2 | 2.581989 | 0.55012  | 0 |
| 610   | BCL10                    | 1557258_a.at | 0.774597 | 2        | 2.581989    | 1.645686897  | 4224 SHB       | 204657_s.at  | -0.7746 | -2 | 2.581989 | 0.550268 | 0 |
| 10644 | STGALNAC5                | 220979_s.at  | 0.774597 | 2        | 2.581989    | 1.645047389  | 16138 FLJ33868 | 242477.at    | -0.7746 | -2 | 2.581989 | 0.550513 | 0 |
| 9314  | FXC1                     | 217981_s.at  | 0.774597 | 2        | 2.581989    | 1.640140948  | 10232 TASP1    | 219443.at    | -0.7746 | -2 | 2.581989 | 0.550726 | 0 |
| 90    | FLJ30430                 | 1552942.at   | 0.774597 | 2        | 2.581989    | 1.640102171  | 928 ANXA2      | 1568126.at   | -0.7746 | -2 | 2.581989 | 0.55091  | 0 |





|       |            |         |      |          |   |          |              |   |       |           |         |      |         |    |          |          |   |
|-------|------------|---------|------|----------|---|----------|--------------|---|-------|-----------|---------|------|---------|----|----------|----------|---|
| 13684 | SLC39A11   | 227046  | at   | 0.774597 | 2 | 2.581989 | 1.594909479  | 0 | 15613 | NDUFS1    | 236356  | at   | -0.7746 | -2 | 2.581989 | 0.567369 | 0 |
| 9421  | XAB2       | 218110  | at   | 0.774597 | 2 | 2.581989 | 1.594710744  | 0 | 8830  | PLCL2     | 216218  | s.at | -0.7746 | -2 | 2.581989 | 0.567462 | 0 |
| 865   | MGC4189    | 1564301 | a.at | 0.774597 | 2 | 2.581989 | 1.594007491  | 0 | 6466  | MSX2      | 210319  | x.at | -0.7746 | -2 | 2.581989 | 0.567485 | 0 |
| 905   | FLJ35848   | 1566480 | x.at | 0.774597 | 2 | 2.581989 | 1.593421654  | 0 | 455   | UGCGL2    | 1555561 | a.at | -0.7746 | -2 | 2.581989 | 0.568136 | 0 |
| 11082 | PLGLB1     | 222249  | at   | 0.774597 | 2 | 2.581989 | 1.592446449  | 0 | 6739  | MAP4K5    | 211081  | s.at | -0.7746 | -2 | 2.581989 | 0.568236 | 0 |
| 15201 | KIAA1442   | 233850  | s.at | 0.774597 | 2 | 2.581989 | 1.592351958  | 0 | 14245 | TAF9L     | 228483  | s.at | -0.7746 | -2 | 2.581989 | 0.568297 | 0 |
| 5181  | SP140      | 207777  | s.at | 0.774597 | 2 | 2.581989 | 1.591800518  | 0 | 4650  | ANGPT1    | 205609  | at   | -0.7746 | -2 | 2.581989 | 0.568374 | 0 |
| 8787  | IGHMBP2    | 215980  | s.at | 0.774597 | 2 | 2.581989 | 1.591730425  | 0 | 10418 | MOCOS     | 219959  | at   | -0.7746 | -2 | 2.581989 | 0.568511 | 0 |
| 8176  | GTPBP3     | 213835  | x.at | 0.774597 | 2 | 2.581989 | 1.591705727  | 0 | 16238 | SUGT1     | 244368  | x.at | -0.7746 | -2 | 2.581989 | 0.568734 | 0 |
| 14796 | C14ORF116  | 230790  | x.at | 0.774597 | 2 | 2.581989 | 1.590103849  | 0 | 4589  | GSTT2     | 205439  | at   | -0.7746 | -2 | 2.581989 | 0.569761 | 0 |
| 10846 | ZFHHC11    | 221646  | s.at | 0.774597 | 2 | 2.581989 | 1.590024331  | 0 | 14560 | CHD9      | 229586  | at   | -0.7746 | -2 | 2.581989 | 0.569871 | 0 |
| 5523  | FSTL1      | 208782  | at   | 0.774597 | 2 | 2.581989 | 1.589949899  | 0 | 2780  | TRIB2     | 202479  | s.at | -0.7746 | -2 | 2.581989 | 0.569991 | 0 |
| 15221 | ZNF445     | 233992  | x.at | 0.774597 | 2 | 2.581989 | 1.589138405  | 0 | 11106 | RNF126P1  | 222349  | x.at | -0.7746 | -2 | 2.581989 | 0.570047 | 0 |
| 869   | K-ALPHA-1  | 1556568 | at   | 0.774597 | 2 | 2.581989 | 1.588669951  | 0 | 8320  | ABCB9     | 214209  | s.at | -0.7746 | -2 | 2.581989 | 0.570219 | 0 |
| 1520  | SSR4       | 201004  | at   | 0.774597 | 2 | 2.581989 | 1.5885900495 | 0 | 2780  | TRIB2     | 202479  | s.at | -0.7746 | -2 | 2.581989 | 0.570367 | 0 |
| 4754  | HABP2      | 206010  | at   | 0.774597 | 2 | 2.581989 | 1.58625818   | 0 | 15454 | ADCY3     | 235441  | at   | -0.7746 | -2 | 2.581989 | 0.570768 | 0 |
| 10450 | MAGEC2     | 220062  | s.at | 0.774597 | 2 | 2.581989 | 1.586073106  | 0 | 13911 | GNA13     | 227539  | at   | -0.7746 | -2 | 2.581989 | 0.570882 | 0 |
| 4825  | ZNF239     | 206261  | at   | 0.774597 | 2 | 2.581989 | 1.585205267  | 0 | 14659 | FALZ      | 230056  | at   | -0.7746 | -2 | 2.581989 | 0.570972 | 0 |
| 8566  | CACNA1A    | 214933  | at   | 0.774597 | 2 | 2.581989 | 1.584283513  | 0 | 16102 | C6ORF56   | 242277  | at   | -0.7746 | -2 | 2.581989 | 0.571082 | 0 |
| 13289 | PKN3       | 226299  | at   | 0.774597 | 2 | 2.581989 | 1.583201685  | 0 | 9194  | VPS24     | 217837  | s.at | -0.7746 | -2 | 2.581989 | 0.571115 | 0 |
| 3438  | POLG       | 203366  | at   | 0.774597 | 2 | 2.581989 | 1.583178233  | 0 | 7394  | KIAA0256  | 212450  | at   | -0.7746 | -2 | 2.581989 | 0.571225 | 0 |
| 4327  | TAOK2      | 204878  | s.at | 0.774597 | 2 | 2.581989 | 1.5830956762 | 0 | 16012 | C4ORF12   | 241401  | at   | -0.7746 | -2 | 2.581989 | 0.571348 | 0 |
| 2721  | IFI27      | 202411  | at   | 0.774597 | 2 | 2.581989 | 1.580312316  | 0 | 10172 | GRAMD1C   | 219313  | at   | -0.7746 | -2 | 2.581989 | 0.571628 | 0 |
| 2052  | INPPL1     | 201598  | s.at | 0.774597 | 2 | 2.581989 | 1.579136169  | 0 | 13090 | PRICKLE2  | 225968  | at   | -0.7746 | -2 | 2.581989 | 0.571631 | 0 |
| 8595  | RREB1      | 215032  | at   | 0.774597 | 2 | 2.581989 | 1.578683595  | 0 | 3258  | IMP2A     | 203126  | at   | -0.7746 | -2 | 2.581989 | 0.572238 | 0 |
| 8794  | LINK-GEFII | 216006  | at   | 0.774597 | 2 | 2.581989 | 1.577579475  | 0 | 11426 | FLJ70997  | 222851  | at   | -0.7746 | -2 | 2.581989 | 0.572345 | 0 |
| 3002  | GPC1       | 202755  | s.at | 0.774597 | 2 | 2.581989 | 1.577494692  | 0 | 14119 | MRPS22    | 228059  | x.at | -0.7746 | -2 | 2.581989 | 0.572594 | 0 |
| 578   | LOC283994  | 1556533 | at   | 0.774597 | 2 | 2.581989 | 1.577296567  | 0 | 16002 | LOC157378 | 241342  | at   | -0.7746 | -2 | 2.581989 | 0.572609 | 0 |
| 8462  | GNA11      | 214679  | x.at | 0.774597 | 2 | 2.581989 | 1.577092061  | 0 | 14896 | KIAA1217  | 231807  | at   | -0.7746 | -2 | 2.581989 | 0.572815 | 0 |
| 6539  | POLR3C     | 210573  | s.at | 0.774597 | 2 | 2.581989 | 1.576664197  | 0 | 14859 | SILC35D2  | 231437  | at   | -0.7746 | -2 | 2.581989 | 0.572917 | 0 |
| 3551  | WDR39      | 203536  | s.at | 0.774597 | 2 | 2.581989 | 1.576569842  | 0 | 1272  | RPS27     | 200741  | s.at | -0.7746 | -2 | 2.581989 | 0.572988 | 0 |
| 636   | EHPB1L1    | 1557749 | at   | 0.774597 | 2 | 2.581989 | 1.576892857  | 0 | 14130 | PHF14     | 228095  | at   | -0.7746 | -2 | 2.581989 | 0.573082 | 0 |
| 5097  | CCR9       | 207445  | s.at | 0.774597 | 2 | 2.581989 | 1.576414781  | 0 | 15538 | CLRF3     | 235803  | at   | -0.7746 | -2 | 2.581989 | 0.573119 | 0 |
| 16183 | AKT3       | 242876  | at   | 0.774597 | 2 | 2.581989 | 1.574971815  | 0 | 5926  | SILC39A8  | 209267  | s.at | -0.7746 | -2 | 2.581989 | 0.573763 | 0 |
| 15282 | KIAA1728   | 234870  | at   | 0.774597 | 2 | 2.581989 | 1.574924319  | 0 | 15241 | NYREN18   | 234332  | at   | -0.7746 | -2 | 2.581989 | 0.573772 | 0 |
| 6460  | XDH        | 210301  | at   | 0.774597 | 2 | 2.581989 | 1.574735331  | 0 | 14834 | PPP2R5E   | 231101  | at   | -0.7746 | -2 | 2.581989 | 0.573981 | 0 |
| 10467 | ANKRD5     | 220144  | s.at | 0.774597 | 2 | 2.581989 | 1.574536377  | 0 | 4937  | DNAJC4    | 206782  | s.at | -0.7746 | -2 | 2.581989 | 0.573959 | 0 |
| 8889  | LOC442175  | 216490  | x.at | 0.774597 | 2 | 2.581989 | 1.574428967  | 0 | 11206 | REP1N1    | 222501  | s.at | -0.7746 | -2 | 2.581989 | 0.573978 | 0 |
| 4163  | TBC1D8     | 204526  | s.at | 0.774597 | 2 | 2.581989 | 1.57405244   | 0 | 11382 | MYEF2     | 222771  | s.at | -0.7746 | -2 | 2.581989 | 0.574494 | 0 |
| 13002 | TBRG1      | 225818  | s.at | 0.774597 | 2 | 2.581989 | 1.572063877  | 0 | 10478 | NUBPL     | 220176  | at   | -0.7746 | -2 | 2.581989 | 0.574606 | 0 |
| 14888 | LOC51057   | 231770  | x.at | 0.774597 | 2 | 2.581989 | 1.571876152  | 0 | 13296 | C13ORF10  | 226316  | at   | -0.7746 | -2 | 2.581989 | 0.574621 | 0 |
| 16539 | DND1       | 57739   | at   | 0.774597 | 2 | 2.581989 | 1.571540675  | 0 | 5030  | DDR1      | 207169  | x.at | -0.7746 | -2 | 2.581989 | 0.574645 | 0 |
| 12548 | ELOF1      | 225156  | at   | 0.774597 | 2 | 2.581989 | 1.570962199  | 0 | 4389  | MBNL2     | 205018  | s.at | -0.7746 | -2 | 2.581989 | 0.574672 | 0 |
| 6409  | ME2        | 210153  | s.at | 0.774597 | 2 | 2.581989 | 1.570939662  | 0 | 11573 | USP47     | 223119  | s.at | -0.7746 | -2 | 2.581989 | 0.574926 | 0 |
| 15371 | PARD6B     | 235165  | at   | 0.774597 | 2 | 2.581989 | 1.57056085   | 0 | 7859  | MED8      | 213126  | at   | -0.7746 | -2 | 2.581989 | 0.574961 | 0 |
| 14256 | SAMD9      | 228531  | at   | 0.774597 | 2 | 2.581989 | 1.568667838  | 0 | 9625  | MED9      | 218372  | at   | -0.7746 | -2 | 2.581989 | 0.57502  | 0 |
| 437   | KIAA1970   | 1555437 | at   | 0.774597 | 2 | 2.581989 | 1.568612867  | 0 | 16359 | KIAA0280  | 36612   | at   | -0.7746 | -2 | 2.581989 | 0.575058 | 0 |
| 5293  | C4BPB      | 208209  | s.at | 0.774597 | 2 | 2.581989 | 1.568177722  | 0 | 10599 | GPHN      | 220773  | s.at | -0.7746 | -2 | 2.581989 | 0.575725 | 0 |
| 4559  | PLAG1      | 206372  | at   | 0.774597 | 2 | 2.581989 | 1.568172731  | 0 | 14449 | PARP11    | 229138  | at   | -0.7746 | -2 | 2.581989 | 0.575956 | 0 |
| 5957  | CASP4      | 209310  | s.at | 0.774597 | 2 | 2.581989 | 1.567226891  | 0 | 1932  | JUN       | 2201464 | x.at | -0.7746 | -2 | 2.581989 | 0.576129 | 0 |
| 4808  | HERC3      | 206183  | s.at | 0.774597 | 2 | 2.581989 | 1.565922921  | 0 | 134   | TEAD1     | 1553322 | s.at | -0.7746 | -2 | 2.581989 | 0.576318 | 0 |
| 4918  | PTPN6      | 206687  | s.at | 0.774597 | 2 | 2.581989 | 1.565415716  | 0 | 2715  | SRF       | 202401  | s.at | -0.7746 | -2 | 2.581989 | 0.576617 | 0 |
| 2141  | PGRM2      | 201701  | s.at | 0.774597 | 2 | 2.581989 | 1.565076202  | 0 | 2651  | EHMT2     | 202326  | at   | -0.7746 | -2 | 2.581989 | 0.576945 | 0 |
| 14870 | PROCP      | 231588  | at   | 0.774597 | 2 | 2.581989 | 1.564329476  | 0 | 6311  | BRAP      | 209922  | at   | -0.7746 | -2 | 2.581989 | 0.577111 | 0 |
| 14101 | CGI-100    | 228022  | at   | 0.774597 | 2 | 2.581989 | 1.562614379  | 0 | 7690  | PAQR4     | 212858  | at   | -0.7746 | -2 | 2.581989 | 0.577129 | 0 |
| 15279 | NLN        | 234762  | x.at | 0.774597 | 2 | 2.581989 | 1.562079823  | 0 | 8454  | RIPK5     | 214663  | at   | -0.7746 | -2 | 2.581989 | 0.577521 | 0 |
| 1696  | SLC7A5     | 201195  | s.at | 0.774597 | 2 | 2.581989 | 1.561828069  | 0 | 10383 | NARF      | 219862  | s.at | -0.7746 | -2 | 2.581989 | 0.577698 | 0 |

|       |              |          |   |          |              |   |       |           |         |      |         |    |          |          |   |
|-------|--------------|----------|---|----------|--------------|---|-------|-----------|---------|------|---------|----|----------|----------|---|
| 10580 | K10RFL110    | 0.774597 | 2 | 2.581989 | 1.561152662  | 0 | 12388 | SLC41A3   | 224931  | at   | -0.7746 | -2 | 2.581989 | 0.577839 | 0 |
| 16234 | KIAA1324L    | 0.774597 | 2 | 2.581989 | 1.561001287  | 0 | 8730  | PRIM2A    | 215708  | s.at | -0.7746 | -2 | 2.581989 | 0.578229 | 0 |
| 15301 | LOC130589    | 0.774597 | 2 | 2.581989 | 1.560709013  | 0 | 9486  | OXR1      | 218197  | s.at | -0.7746 | -2 | 2.581989 | 0.578294 | 0 |
| 8112  | GOLGIN-67    | 0.774597 | 2 | 2.581989 | 1.560630652  | 0 | 8233  | SUZ12     | 213971  | s.at | -0.7746 | -2 | 2.581989 | 0.578504 | 0 |
| 5151  | MUSK         | 0.774597 | 2 | 2.581989 | 1.560471976  | 0 | 4816  | RASA3     | 206220  | s.at | -0.7746 | -2 | 2.581989 | 0.578539 | 0 |
| 7388  | RAI3         | 0.774597 | 2 | 2.581989 | 1.559956716  | 0 | 314   | MBP       | 1554544 | a.at | -0.7746 | -2 | 2.581989 | 0.578597 | 0 |
| 5014  | UGT1A1       | 0.774597 | 2 | 2.581989 | 1.559067132  | 0 | 16299 | EZH1      | 32259   | at   | -0.7746 | -2 | 2.581989 | 0.578807 | 0 |
| 820   | ZNF583       | 0.774597 | 2 | 2.581989 | 1.5583882926 | 0 | 2619  | CDKN1A    | 202284  | s.at | -0.7746 | -2 | 2.581989 | 0.578906 | 0 |
| 1000  | DYRK3        | 0.774597 | 2 | 2.581989 | 1.557754443  | 0 | 13863 | KIAA2018  | 227433  | at   | -0.7746 | -2 | 2.581989 | 0.579564 | 0 |
| 931   | TROAP        | 0.774597 | 2 | 2.581989 | 1.557660911  | 0 | 14331 | FLJ13611  | 228745  | at   | -0.7746 | -2 | 2.581989 | 0.579634 | 0 |
| 6167  | PLD2         | 0.774597 | 2 | 2.581989 | 1.555542355  | 0 | 1238  | LITAF     | 200704  | at   | -0.7746 | -2 | 2.581989 | 0.579768 | 0 |
| 10433 | MAN2A2       | 0.774597 | 2 | 2.581989 | 1.555378486  | 0 | 3114  | PLAUGL2   | 202925  | s.at | -0.7746 | -2 | 2.581989 | 0.579834 | 0 |
| 29    | ETV3         | 0.774597 | 2 | 2.581989 | 1.554559505  | 0 | 79    | TLOC1     | 1552790 | a.at | -0.7746 | -2 | 2.581989 | 0.57995  | 0 |
| 10678 | APOL3        | 0.774597 | 2 | 2.581989 | 1.554421379  | 0 | 8361  | NOV       | 214321  | at   | -0.7746 | -2 | 2.581989 | 0.580398 | 0 |
| 15653 | DKFZP564O186 | 0.774597 | 2 | 2.581989 | 1.554396339  | 0 | 15951 | BTf       | 239897  | at   | -0.7746 | -2 | 2.581989 | 0.580413 | 0 |
| 5185  | TPT1         | 0.774597 | 2 | 2.581989 | 1.553212846  | 0 | 14224 | PDCD2     | 228420  | at   | -0.7746 | -2 | 2.581989 | 0.580531 | 0 |
| 10606 | SLC35E1      | 0.774597 | 2 | 2.581989 | 1.552682183  | 0 | 16176 | HCG18     | 242812  | at   | -0.7746 | -2 | 2.581989 | 0.580824 | 0 |
| 192   | C21ORF93     | 0.774597 | 2 | 2.581989 | 1.552533993  | 0 | 5978  | IKBKB     | 209342  | s.at | -0.7746 | -2 | 2.581989 | 0.580955 | 0 |
| 5157  | TBX6         | 0.774597 | 2 | 2.581989 | 1.551817957  | 0 | 2581  | NNMT      | 202238  | s.at | -0.7746 | -2 | 2.581989 | 0.581055 | 0 |
| 3758  | SMN1         | 0.774597 | 2 | 2.581989 | 1.551143803  | 0 | 11129 | PNRC2     | 222406  | s.at | -0.7746 | -2 | 2.581989 | 0.581082 | 0 |
| 15756 | FLJ21079     | 0.774597 | 2 | 2.581989 | 1.550400559  | 0 | 3977  | RNGT      | 204208  | at   | -0.7746 | -2 | 2.581989 | 0.581104 | 0 |
| 8010  | PRSS3        | 0.774597 | 2 | 2.581989 | 1.550144416  | 0 | 1982  | NCBP2     | 201521  | s.at | -0.7746 | -2 | 2.581989 | 0.581258 | 0 |
| 4032  | PMAIP1       | 0.774597 | 2 | 2.581989 | 1.549707602  | 0 | 3161  | ARNT2     | 202986  | at   | -0.7746 | -2 | 2.581989 | 0.581616 | 0 |
| 14565 | SPTY2D1      | 0.774597 | 2 | 2.581989 | 1.548629007  | 0 | 5118  | PAHA1     | 207543  | s.at | -0.7746 | -2 | 2.581989 | 0.581704 | 0 |
| 4131  | OSTF1        | 0.774597 | 2 | 2.581989 | 1.547832955  | 0 | 7990  | RPS12     | 213377  | x.at | -0.7746 | -2 | 2.581989 | 0.58175  | 0 |
| 8182  | PPP2R2B      | 0.774597 | 2 | 2.581989 | 1.546141607  | 0 | 5171  | SPAST     | 207724  | s.at | -0.7746 | -2 | 2.581989 | 0.581767 | 0 |
| 5216  | ZFX          | 0.774597 | 2 | 2.581989 | 1.545357977  | 0 | 11158 | VPS24     | 222437  | s.at | -0.7746 | -2 | 2.581989 | 0.581817 | 0 |
| 11442 | MGC3169      | 0.774597 | 2 | 2.581989 | 1.545302777  | 0 | 13490 | PANK1     | 226649  | at   | -0.7746 | -2 | 2.581989 | 0.581953 | 0 |
| 6835  | TTY9         | 0.774597 | 2 | 2.581989 | 1.544197531  | 0 | 7406  | C14ORF154 | 212465  | at   | -0.7746 | -2 | 2.581989 | 0.58203  | 0 |
| 15662 | MGC50372     | 0.774597 | 2 | 2.581989 | 1.544000879  | 0 | 12241 | MIB1      | 224722  | at   | -0.7746 | -2 | 2.581989 | 0.582075 | 0 |
| 6422  | PSG1         | 0.774597 | 2 | 2.581989 | 1.544197531  | 0 | 12424 | CGORF89   | 224977  | at   | -0.7746 | -2 | 2.581989 | 0.582185 | 0 |
| 15985 | TTN          | 0.774597 | 2 | 2.581989 | 1.542784163  | 0 | 15398 | DYX1C1    | 235273  | at   | -0.7746 | -2 | 2.581989 | 0.582317 | 0 |
| 8676  | GK2          | 0.774597 | 2 | 2.581989 | 1.542617196  | 0 | 15670 | SPTBN5    | 237097  | at   | -0.7746 | -2 | 2.581989 | 0.58264  | 0 |
| 12160 | TBC1D14      | 0.774597 | 2 | 2.581989 | 1.541572196  | 0 | 10956 | EV11      | 221884  | at   | -0.7746 | -2 | 2.581989 | 0.583002 | 0 |
| 15481 | RBMS2        | 0.774597 | 2 | 2.581989 | 1.540632256  | 0 | 989   | TTC3      | 1569472 | s.at | -0.7746 | -2 | 2.581989 | 0.583213 | 0 |
| 4946  | OXTB         | 0.774597 | 2 | 2.581989 | 1.54040759   | 0 | 566   | KIAA0090  | 1556186 | s.at | -0.7746 | -2 | 2.581989 | 0.583303 | 0 |
| 10396 | ZSCAN5       | 0.774597 | 2 | 2.581989 | 1.539967105  | 0 | 8324  | ALMS1     | 214220  | s.at | -0.7746 | -2 | 2.581989 | 0.584061 | 0 |
| 3710  | BLVRA        | 0.774597 | 2 | 2.581989 | 1.539349023  | 0 | 2037  | TXNDC13   | 201581  | at   | -0.7746 | -2 | 2.581989 | 0.584239 | 0 |
| 13242 | IL7R         | 0.774597 | 2 | 2.581989 | 1.537356786  | 0 | 6632  | COG7      | 210820  | x.at | -0.7746 | -2 | 2.581989 | 0.584579 | 0 |
| 6802  | MCAM         | 0.774597 | 2 | 2.581989 | 1.536744734  | 0 | 1937  | ZMYM6     | 227594  | at   | -0.7746 | -2 | 2.581989 | 0.584737 | 0 |
| 13643 | GOLGA3       | 0.774597 | 2 | 2.581989 | 1.535985394  | 0 | 12867 | LOC286144 | 225603  | s.at | -0.7746 | -2 | 2.581989 | 0.584768 | 0 |
| 15256 | OR5112       | 0.774597 | 2 | 2.581989 | 1.535804702  | 0 | 10844 | RERE      | 221643  | s.at | -0.7746 | -2 | 2.581989 | 0.58483  | 0 |
| 8661  | MYH15        | 0.774597 | 2 | 2.581989 | 1.535320823  | 0 | 3424  | ETV5      | 203348  | s.at | -0.7746 | -2 | 2.581989 | 0.585316 | 0 |
| 10258 | C10RF82      | 0.774597 | 2 | 2.581989 | 1.534759358  | 0 | 8398  | CDC42BPA  | 214464  | at   | -0.7746 | -2 | 2.581989 | 0.586113 | 0 |
| 15352 | FNBP4        | 0.774597 | 2 | 2.581989 | 1.534437096  | 0 | 2960  | TMEM63A   | 202700  | s.at | -0.7746 | -2 | 2.581989 | 0.58628  | 0 |
| 3496  | SAT          | 0.774597 | 2 | 2.581989 | 1.534109634  | 0 | 3808  | ARG2      | 203946  | s.at | -0.7746 | -2 | 2.581989 | 0.586524 | 0 |
| 2322  | DAF          | 0.774597 | 2 | 2.581989 | 1.533715517  | 0 | 1933  | JUN       | 201466  | s.at | -0.7746 | -2 | 2.581989 | 0.586631 | 0 |
| 3169  | AMOTL2       | 0.774597 | 2 | 2.581989 | 1.533087241  | 0 | 5476  | RAB2      | 208732  | at   | -0.7746 | -2 | 2.581989 | 0.58705  | 0 |
| 11925 | AFAP         | 0.774597 | 2 | 2.581989 | 1.532570183  | 0 | 13077 | RASSF8    | 225946  | at   | -0.7746 | -2 | 2.581989 | 0.587302 | 0 |
| 6232  | MFAP5        | 0.774597 | 2 | 2.581989 | 1.53222138   | 0 | 95    | TNRC5     | 1552977 | a.at | -0.7746 | -2 | 2.581989 | 0.587411 | 0 |
| 104   | BCL2L11      | 0.774597 | 2 | 2.581989 | 1.532073094  | 0 | 5355  | PTMAP7    | 208549  | x.at | -0.7746 | -2 | 2.581989 | 0.587447 | 0 |
| 4966  | TAT          | 0.774597 | 2 | 2.581989 | 1.532063739  | 0 | 9981  | FBXL15    | 218938  | at   | -0.7746 | -2 | 2.581989 | 0.588263 | 0 |
| 13250 | PAWR         | 0.774597 | 2 | 2.581989 | 1.53138612   | 0 | 6931  | PTN       | 211737  | x.at | -0.7746 | -2 | 2.581989 | 0.588304 | 0 |
| 4271  | NAO1         | 0.774597 | 2 | 2.581989 | 1.530989534  | 0 | 11168 | TM6PAI    | 222449  | at   | -0.7746 | -2 | 2.581989 | 0.588317 | 0 |
| 16263 | LOC339933    | 0.774597 | 2 | 2.581989 | 1.529169879  | 0 | 10382 | LY6G5C    | 219860  | at   | -0.7746 | -2 | 2.581989 | 0.588386 | 0 |
|       |              |          |   |          |              |   | 14779 | RNF182    | 230720  | at   | -0.7746 | -2 | 2.581989 | 0.588695 | 0 |

|       |               |          |         |    |    |   |       |           |         |    |         |         |          |          |          |   |
|-------|---------------|----------|---------|----|----|---|-------|-----------|---------|----|---------|---------|----------|----------|----------|---|
| 6111  | AKAP13        | 0.774597 | 209534  | x  | at | 0 | 15587 | HOOK3     | 236192  | at | -0.7746 | -2      | 2.581989 | 0.588786 | 0        |   |
| 16321 | RBMS2         | 0.774597 | 34187   | at |    | 0 | 9790  | HECA      | 218603  | at | -0.7746 | -2      | 2.581989 | 0.588865 | 0        |   |
| 868   | TREML4        | 0.774597 | 1564052 | at |    | 0 | 16523 | MARK4     | 55065   | at | -0.7746 | -2      | 2.581989 | 0.588901 | 0        |   |
| 5036  | CASP7         | 0.774597 | 207181  | s  | at | 0 | 15381 | FBXW2     | 235195  | at | -0.7746 | -2      | 2.581989 | 0.588975 | 0        |   |
| 4077  | F3            | 0.774597 | 204363  | at |    | 0 | 11091 | KIAA1387  | 222270  | at | -0.7746 | -2      | 2.581989 | 0.588997 | 0        |   |
| 16089 | LOC256112     | 0.774597 | 242208  | at |    | 0 | 8896  | BRCC3     | 216521  | s  | at      | -0.7746 | -2       | 2.581989 | 0.589868 | 0 |
| 15421 | LOC144871     | 0.774597 | 236341  | at |    | 0 | 3239  | RAPGEF2   | 203096  | s  | at      | -0.7746 | -2       | 2.581989 | 0.5901   | 0 |
| 15217 | ZNF295        | 0.774597 | 233952  | s  | at | 0 | 13015 | TEF       | 225840  | at | -0.7746 | -2      | 2.581989 | 0.590436 | 0        |   |
| 14825 | HRSLSL5       | 0.774597 | 231050  | at |    | 0 | 16031 | MGC33382  | 241733  | at | -0.7746 | -2      | 2.581989 | 0.590446 | 0        |   |
| 4462  | CLTB          | 0.774597 | 205172  | x  | at | 0 | 14920 | LOC144501 | 231849  | at | -0.7746 | -2      | 2.581989 | 0.591002 | 0        |   |
| 848   | FHAD1         | 0.774597 | 1563639 | a  | at | 0 | 5842  | RXR8      | 209148  | at | -0.7746 | -2      | 2.581989 | 0.591202 | 0        |   |
| 8478  | ALMS1         | 0.774597 | 214707  | x  | at | 0 | 15367 | CORF13    | 205143  | at | -0.7746 | -2      | 2.581989 | 0.591348 | 0        |   |
| 16168 | ZNF420        | 0.774597 | 242761  | s  | at | 0 | 6319  | RIPK1     | 209941  | at | -0.7746 | -2      | 2.581989 | 0.591483 | 0        |   |
| 14002 | CLIC6         | 0.774597 | 227742  | at |    | 0 | 967   | ZNF642    | 1569107 | s  | at      | -0.7746 | -2       | 2.581989 | 0.591514 | 0 |
| 179   | RHEBL1        | 0.774597 | 1553713 | a  | at | 0 | 11919 | KBTBD4    | 223765  | s  | at      | -0.7746 | -2       | 2.581989 | 0.591542 | 0 |
| 10390 | KCNK4         | 0.774597 | 219883  | at |    | 0 | 12588 | MTRF1L    | 225206  | s  | at      | -0.7746 | -2       | 2.581989 | 0.591546 | 0 |
| 5168  | PKP2          | 0.774597 | 207717  | s  | at | 0 | 1065  | RPS11     | 200031  | s  | at      | -0.7746 | -2       | 2.581989 | 0.591584 | 0 |
| 10652 | GPR63         | 0.774597 | 220993  | s  | at | 0 | 133   | C6ORF151  | 1553274 | a  | at      | -0.7746 | -2       | 2.581989 | 0.591809 | 0 |
| 4698  | C16ORF7       | 0.774597 | 205781  | at |    | 0 | 78    | TLOC1     | 1552769 | at | -0.7746 | -2      | 2.581989 | 0.592417 | 0        |   |
| 13156 | MITF          | 0.774597 | 226066  | at |    | 0 | 3003  | GPC1      | 202756  | s  | at      | -0.7746 | -2       | 2.581989 | 0.592557 | 0 |
| 13551 | IFT2          | 0.774597 | 226757  | at |    | 0 | 1356  | PLOD1     | 200827  | at | -0.7746 | -2      | 2.581989 | 0.592616 | 0        |   |
| 13662 | C21ORF86      | 0.774597 | 226995  | at |    | 0 | 3597  | ZFXH1B    | 203603  | s  | at      | -0.7746 | -2       | 2.581989 | 0.592737 | 0 |
| 13918 | C9ORF77       | 0.774597 | 227551  | at |    | 0 | 3766  | USP46     | 203869  | at | -0.7746 | -2      | 2.581989 | 0.592966 | 0        |   |
| 3870  | EDG2          | 0.774597 | 204037  | at |    | 0 | 8166  | ABHD5     | 213805  | at | -0.7746 | -2      | 2.581989 | 0.593305 | 0        |   |
| 4290  | TRIM21        | 0.774597 | 204804  | at |    | 0 | 2014  | VAMP2     | 201556  | s  | at      | -0.7746 | -2       | 2.581989 | 0.593362 | 0 |
| 161   | C14ORF49      | 0.774597 | 1553644 | at |    | 0 | 7218  | OPA1      | 212214  | at | -0.7746 | -2      | 2.581989 | 0.593651 | 0        |   |
| 10977 | THRAP5        | 0.774597 | 221938  | x  | at | 0 | 16052 | CAMK4     | 241871  | at | -0.7746 | -2      | 2.581989 | 0.59361  | 0        |   |
| 2635  | FEZ2          | 0.774597 | 202305  | s  | at | 0 | 11889 | NUCKS     | 223661  | at | -0.7746 | -2      | 2.581989 | 0.593658 | 0        |   |
| 15411 | ECHDC2        | 0.774597 | 236305  | s  | at | 0 | 15731 | RPS6      | 238156  | at | -0.7746 | -2      | 2.581989 | 0.593705 | 0        |   |
| 4766  | NR2C2         | 0.774597 | 206038  | s  | at | 0 | 294   | DNAJC14   | 1554451 | s  | at      | -0.7746 | -2       | 2.581989 | 0.5938   | 0 |
| 894   | SLC5A11       | 0.774597 | 1565880 | at |    | 0 | 10836 | ZNF19L    | 221618  | at | -0.7746 | -2      | 2.581989 | 0.594003 | 0        |   |
| 166   | LRRFC44       | 0.774597 | 1563674 | at |    | 0 | 7032  | COL4A1    | 211980  | at | -0.7746 | -2      | 2.581989 | 0.594263 | 0        |   |
| 14480 | KDFZP434E231E | 0.774597 | 229298  | at |    | 0 | 15293 | FAM54A    | 234944  | a  | at      | -0.7746 | -2       | 2.581989 | 0.594313 | 0 |
| 9530  | MID1P1        | 0.774597 | 218251  | at |    | 0 | 778   | MDFIC     | 1559942 | at | -0.7746 | -2      | 2.581989 | 0.594592 | 0        |   |
| 10272 | GEMING        | 0.774597 | 219539  | at |    | 0 | 15442 | PGBD1     | 235411  | at | -0.7746 | -2      | 2.581989 | 0.59486  | 0        |   |
| 15941 | RNF40         | 0.774597 | 239801  | at |    | 0 | 8443  | NRP2      | 214632  | at | -0.7746 | -2      | 2.581989 | 0.594885 | 0        |   |
| 11999 | TRIM4         | 0.774597 | 224159  | x  | at | 0 | 14718 | C16ORF46  | 230281  | at | -0.7746 | -2      | 2.581989 | 0.595424 | 0        |   |
| 12112 | MALAT1        | 0.774597 | 224558  | s  | at | 0 | 14451 | CNOT3     | 229143  | at | -0.7746 | -2      | 2.581989 | 0.595628 | 0        |   |
| 15245 | ZNF124        | 0.774597 | 234394  | at |    | 0 | 12748 | EPC1      | 225417  | at | -0.7746 | -2      | 2.581989 | 0.595786 | 0        |   |
| 10440 | STYK1         | 0.774597 | 220030  | at |    | 0 | 8948  | RRN3      | 216902  | s  | at      | -0.7746 | -2       | 2.581989 | 0.596257 | 0 |
| 13787 | HPS3          | 0.774597 | 227253  | at |    | 0 | 4153  | DPH2      | 204514  | at | -0.7746 | -2      | 2.581989 | 0.59626  | 0        |   |
| 10064 | IPPK          | 0.774597 | 219092  | s  | at | 0 | 14118 | TMEM44    | 228054  | at | -0.7746 | -2      | 2.581989 | 0.596466 | 0        |   |
| 7942  | COL6A2        | 0.774597 | 213290  | at |    | 0 | 6381  | IGFBP3    | 210095  | s  | at      | -0.7746 | -2       | 2.581989 | 0.596573 | 0 |
| 7574  | PLEKHM1       | 0.774597 | 212700  | x  | at | 0 | 15560 | MLR1      | 235970  | at | -0.7746 | -2      | 2.581989 | 0.596804 | 0        |   |
| 15465 | CPEB2         | 0.774597 | 236479  | at |    | 0 | 13722 | FOXp4     | 227120  | at | -0.7746 | -2      | 2.581989 | 0.597148 | 0        |   |
| 704   | CLG           | 0.774597 | 1558407 | at |    | 0 | 3952  | BTID      | 204167  | at | -0.7746 | -2      | 2.581989 | 0.597439 | 0        |   |
| 264   | C6ORF141      | 0.774597 | 1554314 | at |    | 0 | 3878  | P1TEN     | 204054  | at | -0.7746 | -2      | 2.581989 | 0.598047 | 0        |   |
| 9550  | WDR74         | 0.774597 | 218278  | at |    | 0 | 10721 | MUM1      | 221290  | s  | at      | -0.7746 | -2       | 2.581989 | 0.598179 | 0 |
| 11058 | GFRR1         | 0.774597 | 222164  | at |    | 0 | 14247 | LOC221738 | 228487  | s  | at      | -0.7746 | -2       | 2.581989 | 0.598258 | 0 |
| 3785  | RCP9          | 0.774597 | 203898  | at |    | 0 | 6480  | SSNA1     | 210378  | s  | at      | -0.7746 | -2       | 2.581989 | 0.598287 | 0 |
| 15510 | ENSA          | 0.774597 | 235679  | at |    | 0 | 8065  | SLC18A2   | 213549  | at | -0.7746 | -2      | 2.581989 | 0.598397 | 0        |   |
| 11373 | ARRB1         | 0.774597 | 222756  | s  | at | 0 | 8913  | AKR1C1    | 216594  | x  | at      | -0.7746 | -2       | 2.581989 | 0.598397 | 0 |
| 3624  | FDX1          | 0.774597 | 203646  | at |    | 0 | 5049  | ZFX       | 207247  | x  | at      | -0.7746 | -2       | 2.581989 | 0.598481 | 0 |
|       |               |          |         |    |    |   | 1063  | RPL19     | 200029  | at | -0.7746 | -2      | 2.581989 | 0.598481 | 0        |   |
|       |               |          |         |    |    |   | 16383 | PIAS2     | 37433   | at | -0.7746 | -2      | 2.581989 | 0.598521 | 0        |   |
|       |               |          |         |    |    |   | 6269  | AP4M1     | 209837  | at | -0.7746 | -2      | 2.581989 | 0.598542 | 0        |   |
|       |               |          |         |    |    |   | 14803 | SPG7      | 230884  | s  | at      | -0.7746 | -2       | 2.581989 | 0.598694 | 0 |



|                 |                      |         |    |          |          |   |
|-----------------|----------------------|---------|----|----------|----------|---|
| 14613 EIF2C2    | <u>229841 .at</u>    | -0.7746 | -2 | 2.581989 | 0.608941 | 0 |
| 2876 NRIP1      | <u>202600 .s.at</u>  | -0.7746 | -2 | 2.581989 | 0.608942 | 0 |
| 8905 KIAA0874   | <u>216550 .x.at</u>  | -0.7746 | -2 | 2.581989 | 0.608993 | 0 |
| 12207 FBXO18    | <u>224683 .at</u>    | -0.7746 | -2 | 2.581989 | 0.609057 | 0 |
| 15660 LRRC34    | <u>236917 .at</u>    | -0.7746 | -2 | 2.581989 | 0.609499 | 0 |
| 7447 KIAA0146   | <u>212523 .s.at</u>  | -0.7746 | -2 | 2.581989 | 0.609694 | 0 |
| 4463 CD58       | <u>205173 .x.at</u>  | -0.7746 | -2 | 2.581989 | 0.609701 | 0 |
| 5094 RNUJ1      | <u>207438 .s.at</u>  | -0.7746 | -2 | 2.581989 | 0.609924 | 0 |
| 16597 EHBPI1    | <u>91703 .at</u>     | -0.7746 | -2 | 2.581989 | 0.609981 | 0 |
| 15041 ASPM      | <u>232238 .at</u>    | -0.7746 | -2 | 2.581989 | 0.610307 | 0 |
| 748 MGC5384     | <u>1559059 .s.at</u> | -0.7746 | -2 | 2.581989 | 0.610476 | 0 |
| 16097 METT5D1   | <u>242247 .at</u>    | -0.7746 | -2 | 2.581989 | 0.611229 | 0 |
| 7578 RASA4      | <u>212706 .at</u>    | -0.7746 | -2 | 2.581989 | 0.61154  | 0 |
| 8557 TRRAP      | <u>214908 .s.at</u>  | -0.7746 | -2 | 2.581989 | 0.611689 | 0 |
| 15915 AFF4      | <u>239439 .at</u>    | -0.7746 | -2 | 2.581989 | 0.61182  | 0 |
| 15497 BRIP1     | <u>235609 .at</u>    | -0.7746 | -2 | 2.581989 | 0.611928 | 0 |
| 9049 HLA-DMA    | <u>217478 .s.at</u>  | -0.7746 | -2 | 2.581989 | 0.611934 | 0 |
| 8030 PPP1R7     | <u>213465 .s.at</u>  | -0.7746 | -2 | 2.581989 | 0.612047 | 0 |
| 8623 FLJ36166   | <u>215143 .at</u>    | -0.7746 | -2 | 2.581989 | 0.612211 | 0 |
| 667 TM6SF1      | <u>1558102 .at</u>   | -0.7746 | -2 | 2.581989 | 0.61238  | 0 |
| 9375 WDR41      | <u>218055 .s.at</u>  | -0.7746 | -2 | 2.581989 | 0.612455 | 0 |
| 9069 LOC255925  | <u>217551 .at</u>    | -0.7746 | -2 | 2.581989 | 0.612462 | 0 |
| 1684 GNAI3      | <u>201181 .at</u>    | -0.7746 | -2 | 2.581989 | 0.612702 | 0 |
| 14131 MYLIP     | <u>228098 .s.at</u>  | -0.7746 | -2 | 2.581989 | 0.612741 | 0 |
| 4610 GCNT1      | <u>205505 .at</u>    | -0.7746 | -2 | 2.581989 | 0.612863 | 0 |
| 14373 CXXC6     | <u>228906 .at</u>    | -0.7746 | -2 | 2.581989 | 0.612879 | 0 |
| 7650 SORT1      | <u>212797 .at</u>    | -0.7746 | -2 | 2.581989 | 0.612958 | 0 |
| 11953 LARS      | <u>223888 .s.at</u>  | -0.7746 | -2 | 2.581989 | 0.613112 | 0 |
| 14127 PLA2G12   | <u>228084 .at</u>    | -0.7746 | -2 | 2.581989 | 0.613172 | 0 |
| 16477 SEMA4C    | <u>46665 .at</u>     | -0.7746 | -2 | 2.581989 | 0.613494 | 0 |
| 11453 EHF       | <u>222932 .at</u>    | -0.7746 | -2 | 2.581989 | 0.613549 | 0 |
| 7692 ZDHHC18    | <u>212860 .at</u>    | -0.7746 | -2 | 2.581989 | 0.613601 | 0 |
| 5875 PIM1       | <u>209193 .at</u>    | -0.7746 | -2 | 2.581989 | 0.613632 | 0 |
| 9214 SLC39A9    | <u>217859 .s.at</u>  | -0.7746 | -2 | 2.581989 | 0.613738 | 0 |
| 5946 ID4        | <u>209291 .at</u>    | -0.7746 | -2 | 2.581989 | 0.613901 | 0 |
| 14838 HPS3      | <u>231121 .at</u>    | -0.7746 | -2 | 2.581989 | 0.61412  | 0 |
| 11896 INADL     | <u>223681 .s.at</u>  | -0.7746 | -2 | 2.581989 | 0.614217 | 0 |
| 13160 SPSB1     | <u>226075 .at</u>    | -0.7746 | -2 | 2.581989 | 0.614234 | 0 |
| 14588 APRIN     | <u>229704 .at</u>    | -0.7746 | -2 | 2.581989 | 0.614385 | 0 |
| 13622 ZC3H7A    | <u>226897 .s.at</u>  | -0.7746 | -2 | 2.581989 | 0.614388 | 0 |
| 9863 C1ORF27    | <u>218721 .s.at</u>  | -0.7746 | -2 | 2.581989 | 0.615062 | 0 |
| 7704 MPHOSPH10  | <u>212885 .at</u>    | -0.7746 | -2 | 2.581989 | 0.615074 | 0 |
| 8481 15E1.2     | <u>214711 .at</u>    | -0.7746 | -2 | 2.581989 | 0.615162 | 0 |
| 763 ZCCHC10     | <u>1559399 .s.at</u> | -0.7746 | -2 | 2.581989 | 0.615371 | 0 |
| 13958 PPP2R5E   | <u>227630 .at</u>    | -0.7746 | -2 | 2.581989 | 0.615428 | 0 |
| 1749 RPS6       | <u>201254 .x.at</u>  | -0.7746 | -2 | 2.581989 | 0.615715 | 0 |
| 4487 IL1RAP     | <u>205227 .at</u>    | -0.7746 | -2 | 2.581989 | 0.615816 | 0 |
| 14977 C9ORF82   | <u>231995 .at</u>    | -0.7746 | -2 | 2.581989 | 0.615929 | 0 |
| 8637 GA17       | <u>215190 .at</u>    | -0.7746 | -2 | 2.581989 | 0.616266 | 0 |
| 14065 PTPN3     | <u>227944 .at</u>    | -0.7746 | -2 | 2.581989 | 0.616411 | 0 |
| 221 FLJ32549    | <u>1554067 .at</u>   | -0.7746 | -2 | 2.581989 | 0.616416 | 0 |
| 15178 CDADC1    | <u>233564 .s.at</u>  | -0.7746 | -2 | 2.581989 | 0.6165   | 0 |
| 1052 RPS13      | <u>200018 .at</u>    | -0.7746 | -2 | 2.581989 | 0.616676 | 0 |
| 13487 LOC134492 | <u>226643 .s.at</u>  | -0.7746 | -2 | 2.581989 | 0.616927 | 0 |
| 7380 RPS2       | <u>212433 .x.at</u>  | -0.7746 | -2 | 2.581989 | 0.617091 | 0 |
| 5333 LRP8       | <u>208433 .s.at</u>  | -0.7746 | -2 | 2.581989 | 0.617109 | 0 |
| 8064 HSD17B8    | <u>213540 .at</u>    | -0.7746 | -2 | 2.581989 | 0.617149 | 0 |

|                 |               |         |    |          |          |   |
|-----------------|---------------|---------|----|----------|----------|---|
| 13827 C:16ORF52 | 227351 .at    | -0.7746 | -2 | 2.581989 | 0.617215 | 0 |
| 12667 PHF5A     | 225509 .at    | -0.7746 | -2 | 2.581989 | 0.61722  | 0 |
| 10685 CCG1      | 221156 .x.at  | -0.7746 | -2 | 2.581989 | 0.617321 | 0 |
| 14469 LOC340481 | 229240 .at    | -0.7746 | -2 | 2.581989 | 0.617653 | 0 |
| 5193 PROS1      | 207808 .s.at  | -0.7746 | -2 | 2.581989 | 0.617703 | 0 |
| 13370 TNPO2     | 226428 .at    | -0.7746 | -2 | 2.581989 | 0.617804 | 0 |
| 11294 RFXDC2    | 222630 .at    | -0.7746 | -2 | 2.581989 | 0.617818 | 0 |
| 3835 UTX        | 203990 .s.at  | -0.7746 | -2 | 2.581989 | 0.617861 | 0 |
| 3988 HDAC4      | 204225 .at    | -0.7746 | -2 | 2.581989 | 0.617943 | 0 |
| 1706 RRBP1      | 201206 .s.at  | -0.7746 | -2 | 2.581989 | 0.618201 | 0 |
| 14922 MGC35395  | 231852 .at    | -0.7746 | -2 | 2.581989 | 0.618247 | 0 |
| 2643 UBE4B      | 202317 .s.at  | -0.7746 | -2 | 2.581989 | 0.618343 | 0 |
| 3144 RFX5       | 202963 .at    | -0.7746 | -2 | 2.581989 | 0.618502 | 0 |
| 14665 RA-GEF-2  | 230078 .at    | -0.7746 | -2 | 2.581989 | 0.618623 | 0 |
| 14653 MRPL41    | 230034 .x.at  | -0.7746 | -2 | 2.581989 | 0.618636 | 0 |
| 4853 DDEF2      | 206414 .s.at  | -0.7746 | -2 | 2.581989 | 0.618674 | 0 |
| 16024 ZFH4      | 241700 .at    | -0.7746 | -2 | 2.581989 | 0.618816 | 0 |
| 3929 DOC1       | 204135 .at    | -0.7746 | -2 | 2.581989 | 0.618878 | 0 |
| 14626 RNPC3     | 229903 .x.at  | -0.7746 | -2 | 2.581989 | 0.618937 | 0 |
| 10453 UCHL5     | 220083 .x.at  | -0.7746 | -2 | 2.581989 | 0.619034 | 0 |
| 8575 NUP160     | 214962 .s.at  | -0.7746 | -2 | 2.581989 | 0.619102 | 0 |
| 16506 RBM12B    | 51228 .at     | -0.7746 | -2 | 2.581989 | 0.619185 | 0 |
| 15144 RUFY2     | 233191 .at    | -0.7746 | -2 | 2.581989 | 0.619338 | 0 |
| 9920 LRRC1      | 218816 .at    | -0.7746 | -2 | 2.581989 | 0.619368 | 0 |
| 15530 HFE       | 235754 .at    | -0.7746 | -2 | 2.581989 | 0.619448 | 0 |
| 7333 ZNF292     | 212368 .at    | -0.7746 | -2 | 2.581989 | 0.619595 | 0 |
| 15947 RIT1      | 239843 .at    | -0.7746 | -2 | 2.581989 | 0.619604 | 0 |
| 15096 FLJ10116  | 232682 .at    | -0.7746 | -2 | 2.581989 | 0.619635 | 0 |
| 6714 IKKB       | 211027 .s.at  | -0.7746 | -2 | 2.581989 | 0.619754 | 0 |
| 3297 ALDH1A3    | 203180 .at    | -0.7746 | -2 | 2.581989 | 0.620091 | 0 |
| 12730 SYNCOILIN | 225396 .at    | -0.7746 | -2 | 2.581989 | 0.620113 | 0 |
| 3604 BYSL       | 203612 .at    | -0.7746 | -2 | 2.581989 | 0.620222 | 0 |
| 4140 ARHGAP11A  | 204492 .at    | -0.7746 | -2 | 2.581989 | 0.620343 | 0 |
| 14096 FAM92A1   | 228011 .at    | -0.7746 | -2 | 2.581989 | 0.620628 | 0 |
| 11092 PAPOLG    | 222273 .at    | -0.7746 | -2 | 2.581989 | 0.620644 | 0 |
| 13451 ARHGAP26  | 226576 .at    | -0.7746 | -2 | 2.581989 | 0.620763 | 0 |
| 976 MGC16733    | 1569253 .at   | -0.7746 | -2 | 2.581989 | 0.621532 | 0 |
| 12522 SEST3     | 225123 .at    | -0.7746 | -2 | 2.581989 | 0.621577 | 0 |
| 16013 BTC       | 241412 .at    | -0.7746 | -2 | 2.581989 | 0.621607 | 0 |
| 11841 ANKRD32   | 223542 .at    | -0.7746 | -2 | 2.581989 | 0.621668 | 0 |
| 9151 GALNT2     | 217787 .s.at  | -0.7746 | -2 | 2.581989 | 0.622276 | 0 |
| 10603 RNF31     | 220788 .s.at  | -0.7746 | -2 | 2.581989 | 0.622407 | 0 |
| 6468 BIRC5      | 210334 .x.at  | -0.7746 | -2 | 2.581989 | 0.622713 | 0 |
| 4034 ZNF518     | 204291 .at    | -0.7746 | -2 | 2.581989 | 0.623002 | 0 |
| 1675 BHLHB2     | 201170 .s.at  | -0.7746 | -2 | 2.581989 | 0.623352 | 0 |
| 9868 LXN        | 218729 .at    | -0.7746 | -2 | 2.581989 | 0.623376 | 0 |
| 9887 DVL2       | 218759 .at    | -0.7746 | -2 | 2.581989 | 0.623381 | 0 |
| 607 TPR         | 155727 .s.at  | -0.7746 | -2 | 2.581989 | 0.623388 | 0 |
| 9783 PEO1       | 218590 .at    | -0.7746 | -2 | 2.581989 | 0.623476 | 0 |
| 14881 PCDDHB14  | 231726 .at    | -0.7746 | -2 | 2.581989 | 0.623493 | 0 |
| 9027 EIF3S1     | 217364 .x.at  | -0.7746 | -2 | 2.581989 | 0.623499 | 0 |
| 14652 OSGEPL1   | 230032 .at    | -0.7746 | -2 | 2.581989 | 0.623628 | 0 |
| 11992 HIATL1    | 224078 .at    | -0.7746 | -2 | 2.581989 | 0.623703 | 0 |
| 72 ST7L         | 1552738 .a.at | -0.7746 | -2 | 2.581989 | 0.62391  | 0 |
| 14462 CEP27     | 229208 .at    | -0.7746 | -2 | 2.581989 | 0.624007 | 0 |
| 13340 PPAPDC1B  | 226384 .at    | -0.7746 | -2 | 2.581989 | 0.624021 | 0 |
| 12874 KIAA0303  | 225613 .at    | -0.7746 | -2 | 2.581989 | 0.624126 | 0 |

|                    |         |      |    |          |          |   |
|--------------------|---------|------|----|----------|----------|---|
| 2249 TACSTD1       | 201839  | s.at | -2 | 2.581989 | 0.624195 | 0 |
| 9864 TGIF2         | 218724  | s.at | -2 | 2.581989 | 0.624405 | 0 |
| 16115 MTHFD2L      | 242370  | at   | -2 | 2.581989 | 0.624512 | 0 |
| 12760 15E1.2       | 225430  | at   | -2 | 2.581989 | 0.624574 | 0 |
| 3139 PTPN9         | 202958  | at   | -2 | 2.581989 | 0.624658 | 0 |
| 14154 DISP1        | 228184  | at   | -2 | 2.581989 | 0.625163 | 0 |
| 13725 ZNF706       | 227132  | at   | -2 | 2.581989 | 0.625561 | 0 |
| 8639 PRKCA         | 215195  | at   | -2 | 2.581989 | 0.625608 | 0 |
| 10546 SLC25A21     | 220474  | at   | -2 | 2.581989 | 0.625626 | 0 |
| 65 CASC5           | 1552682 | a.at | -2 | 2.581989 | 0.625661 | 0 |
| 15820 FLJ33979     | 238773  | at   | -2 | 2.581989 | 0.625867 | 0 |
| 8739 MPHOSPH9      | 215731  | s.at | -2 | 2.581989 | 0.626016 | 0 |
| 14574 PREP         | 229644  | at   | -2 | 2.581989 | 0.626041 | 0 |
| 16117 DKFZP434F091 | 242377  | x.at | -2 | 2.581989 | 0.626178 | 0 |
| 15590 MOC52        | 236208  | at   | -2 | 2.581989 | 0.626254 | 0 |
| 6542 TNPO2         | 210585  | s.at | -2 | 2.581989 | 0.626311 | 0 |
| 16394 EPOR         | 37986   | at   | -2 | 2.581989 | 0.626491 | 0 |
| 1003 KIAA1915      | 1569706 | at   | -2 | 2.581989 | 0.626905 | 0 |
| 13375 RASSF4       | 226436  | at   | -2 | 2.581989 | 0.626991 | 0 |
| 3131 IL1R1         | 202948  | at   | -2 | 2.581989 | 0.627063 | 0 |
| 14970 PHF20L1      | 231967  | at   | -2 | 2.581989 | 0.627276 | 0 |
| 13907 C9ORF21      | 227534  | at   | -2 | 2.581989 | 0.627284 | 0 |
| 8451 ITGA1         | 214660  | at   | -2 | 2.581989 | 0.627306 | 0 |
| 12032 EGLN1        | 224314  | s.at | -2 | 2.581989 | 0.627354 | 0 |
| 3429 PSD3          | 203355  | s.at | -2 | 2.581989 | 0.627374 | 0 |
| 1705 RRBP1         | 201204  | s.at | -2 | 2.581989 | 0.627431 | 0 |
| 15504 ESCO1        | 235645  | at   | -2 | 2.581989 | 0.627568 | 0 |
| 5415 ST13          | 208666  | s.at | -2 | 2.581989 | 0.627799 | 0 |
| 15984 RP42         | 240781  | x.at | -2 | 2.581989 | 0.627817 | 0 |
| 804 DPY19L1        | 1560916 | a.at | -2 | 2.581989 | 0.627944 | 0 |
| 15860 FLJ31951     | 238949  | at   | -2 | 2.581989 | 0.628104 | 0 |
| 15842 KIAA0974     | 238859  | at   | -2 | 2.581989 | 0.628205 | 0 |
| 182 ZNF644         | 1553729 | s.at | -2 | 2.581989 | 0.628426 | 0 |
| 13329 SHPRH        | 226366  | at   | -2 | 2.581989 | 0.628453 | 0 |
| 7489 RPS17         | 212578  | x.at | -2 | 2.581989 | 0.628613 | 0 |
| 8882 TRA1          | 216449  | x.at | -2 | 2.581989 | 0.628796 | 0 |
| 16448 SCYL3        | 41329   | at   | -2 | 2.581989 | 0.629006 | 0 |
| 7024 ACTG1         | 211970  | x.at | -2 | 2.581989 | 0.629061 | 0 |
| 5520 DDR1          | 208779  | x.at | -2 | 2.581989 | 0.629088 | 0 |
| 3800 HLA-DMB       | 203932  | at   | -2 | 2.581989 | 0.629208 | 0 |
| 7052 C10RF144      | 212004  | at   | -2 | 2.581989 | 0.629246 | 0 |
| 11827 CENPJ        | 223513  | at   | -2 | 2.581989 | 0.62925  | 0 |
| 4201 PKIA          | 204612  | at   | -2 | 2.581989 | 0.629293 | 0 |
| 7324 KIAA0913      | 212359  | s.at | -2 | 2.581989 | 0.629434 | 0 |
| 6354 MALT1         | 210018  | x.at | -2 | 2.581989 | 0.629509 | 0 |
| 6417 SFRS10        | 210180  | s.at | -2 | 2.581989 | 0.629912 | 0 |
| 10654 ITM2C        | 221004  | s.at | -2 | 2.581989 | 0.629951 | 0 |
| 14841 JAG1         | 231183  | s.at | -2 | 2.581989 | 0.630144 | 0 |
| 6227 SPAST         | 209748  | at   | -2 | 2.581989 | 0.630312 | 0 |
| 16162 ITIH4        | 242720  | at   | -2 | 2.581989 | 0.630525 | 0 |
| 896 FLJ11193       | 1565939 | at   | -2 | 2.581989 | 0.630575 | 0 |
| 5319 UGT8          | 208358  | s.at | -2 | 2.581989 | 0.630658 | 0 |
| 16005 FLJ13215     | 241360  | at   | -2 | 2.581989 | 0.630867 | 0 |
| 2845 TNKS          | 202561  | at   | -2 | 2.581989 | 0.631477 | 0 |
| 10677 TNFSF15      | 221085  | at   | -2 | 2.581989 | 0.631477 | 0 |
| 16284 MRPS22       | 31799   | at   | -2 | 2.581989 | 0.631572 | 0 |
| 6902 IFNGR1        | 211676  | s.at | -2 | 2.581989 | 0.631597 | 0 |



|                 |              |         |    |          |          |   |
|-----------------|--------------|---------|----|----------|----------|---|
| 5078 EDIL3      | 207379 .at   | -0.7746 | -2 | 2.581989 | 0.631679 | 0 |
| 12444 CMTM4     | 225009 .at   | -0.7746 | -2 | 2.581989 | 0.631752 | 0 |
| 6294 LEPR       | 209894 .at   | -0.7746 | -2 | 2.581989 | 0.631894 | 0 |
| 581 LOC351847   | 1556695 a.at | -0.7746 | -2 | 2.581989 | 0.631962 | 0 |
| 81 SENP1        | 1552812 a.at | -0.7746 | -2 | 2.581989 | 0.632789 | 0 |
| 5286 OSBPL1A    | 208158 s.at  | -0.7746 | -2 | 2.581989 | 0.632824 | 0 |
| 15709 CANX      | 238034 .at   | -0.7746 | -2 | 2.581989 | 0.632958 | 0 |
| 2511 NEDD9      | 202149 .at   | -0.7746 | -2 | 2.581989 | 0.633469 | 0 |
| 10123 YJDC      | 219207 .at   | -0.7746 | -2 | 2.581989 | 0.633574 | 0 |
| 3179 SSX2IP     | 203017 s.at  | -0.7746 | -2 | 2.581989 | 0.633732 | 0 |
| 15598 CGI-125   | 236241 .at   | -0.7746 | -2 | 2.581989 | 0.633735 | 0 |
| 5845 TCF3       | 209152 s.at  | -0.7746 | -2 | 2.581989 | 0.633759 | 0 |
| 13247 MCC       | 226225 .at   | -0.7746 | -2 | 2.581989 | 0.634071 | 0 |
| 13672 AOF1      | 227021 .at   | -0.7746 | -2 | 2.581989 | 0.634167 | 0 |
| 4497 PARD6A     | 205245 .at   | -0.7746 | -2 | 2.581989 | 0.634233 | 0 |
| 4001 DBF4       | 204244 s.at  | -0.7746 | -2 | 2.581989 | 0.634389 | 0 |
| 10110 ZBTB7A    | 219186 .at   | -0.7746 | -2 | 2.581989 | 0.634449 | 0 |
| 3868 SCG2       | 204035 .at   | -0.7746 | -2 | 2.581989 | 0.634456 | 0 |
| 15836 FWINL3    | 238823 .at   | -0.7746 | -2 | 2.581989 | 0.634815 | 0 |
| 3568 TRIM38     | 203567 s.at  | -0.7746 | -2 | 2.581989 | 0.634888 | 0 |
| 468 RTN4IP1     | 1555679 a.at | -0.7746 | -2 | 2.581989 | 0.635081 | 0 |
| 15526 FLJ22344  | 235740 .at   | -0.7746 | -2 | 2.581989 | 0.635176 | 0 |
| 1112 RPS6       | 200081 s.at  | -0.7746 | -2 | 2.581989 | 0.635238 | 0 |
| 9923 KCTD9      | 218823 s.at  | -0.7746 | -2 | 2.581989 | 0.635287 | 0 |
| 4482 STK17B     | 205214 .at   | -0.7746 | -2 | 2.581989 | 0.635299 | 0 |
| 7683 NEXILIN    | 212847 .at   | -0.7746 | -2 | 2.581989 | 0.63533  | 0 |
| 6741 PLK4       | 211088 s.at  | -0.7746 | -2 | 2.581989 | 0.635411 | 0 |
| 5058 PDE1C      | 207303 .at   | -0.7746 | -2 | 2.581989 | 0.635424 | 0 |
| 7817 FRMD4B     | 213056 .at   | -0.7746 | -2 | 2.581989 | 0.635501 | 0 |
| 13940 MRPS30    | 227600 .at   | -0.7746 | -2 | 2.581989 | 0.635521 | 0 |
| 9797 TSSC4      | 218612 s.at  | -0.7746 | -2 | 2.581989 | 0.635731 | 0 |
| 15704 PLEKHA2   | 238013 .at   | -0.7746 | -2 | 2.581989 | 0.635778 | 0 |
| 13856 TNFAIP8L1 | 227420 .at   | -0.7746 | -2 | 2.581989 | 0.636076 | 0 |
| 12008 EHF       | 224189 x.at  | -0.7746 | -2 | 2.581989 | 0.636076 | 0 |
| 14932 KIAA1586  | 231869 .at   | -0.7746 | -2 | 2.581989 | 0.636119 | 0 |
| 4345 MLLT3      | 204918 s.at  | -0.7746 | -2 | 2.581989 | 0.636247 | 0 |
| 14819 ARNT      | 231016 s.at  | -0.7746 | -2 | 2.581989 | 0.636316 | 0 |
| 13286 MRPS15    | 226296 s.at  | -0.7746 | -2 | 2.581989 | 0.636499 | 0 |
| 7337 FEM1B      | 212373 .at   | -0.7746 | -2 | 2.581989 | 0.636891 | 0 |
| 7315 YIPF6      | 212342 .at   | -0.7746 | -2 | 2.581989 | 0.636958 | 0 |
| 7511 AKT3       | 212609 s.at  | -0.7746 | -2 | 2.581989 | 0.63697  | 0 |
| 12284 DDEF1     | 224790 .at   | -0.7746 | -2 | 2.581989 | 0.637054 | 0 |
| 9016 SLC37A4    | 217289 s.at  | -0.7746 | -2 | 2.581989 | 0.637215 | 0 |
| 10186 ASCC1     | 219336 s.at  | -0.7746 | -2 | 2.581989 | 0.637606 | 0 |
| 10870 MAP3K2    | 221695 s.at  | -0.7746 | -2 | 2.581989 | 0.637737 | 0 |
| 5919 CSPG6      | 209258 s.at  | -0.7746 | -2 | 2.581989 | 0.638    | 0 |
| 13320 NSUN4     | 226351 .at   | -0.7746 | -2 | 2.581989 | 0.638041 | 0 |
| 456 ZCCHC7      | 1555562 a.at | -0.7746 | -2 | 2.581989 | 0.63843  | 0 |
| 6909 HBB        | 211696 x.at  | -0.7746 | -2 | 2.581989 | 0.638601 | 0 |
| 3768 SENP3      | 203871 .at   | -0.7746 | -2 | 2.581989 | 0.638688 | 0 |
| 9267 C6ORF106   | 217924 .at   | -0.7746 | -2 | 2.581989 | 0.638961 | 0 |
| 10264 ELL3      | 219517 .at   | -0.7746 | -2 | 2.581989 | 0.638978 | 0 |
| 15495 LOC344595 | 235606 .at   | -0.7746 | -2 | 2.581989 | 0.639239 | 0 |
| 14211 CYP4V2    | 228391 .at   | -0.7746 | -2 | 2.581989 | 0.639244 | 0 |
| 6215 ZFP4161    | 209724 s.at  | -0.7746 | -2 | 2.581989 | 0.639264 | 0 |
| 14595 SSF2      | 229744 .at   | -0.7746 | -2 | 2.581989 | 0.639266 | 0 |
| 12634 CZORF12   | 225269 s.at  | -0.7746 | -2 | 2.581989 | 0.639277 | 0 |

|                 |                      |         |    |          |          |   |
|-----------------|----------------------|---------|----|----------|----------|---|
| 13053 CDC91L1   | <u>225903 .at</u>    | -0.7746 | -2 | 2.581989 | 0.639383 | 0 |
| 1729 ENO1       | <u>201231 .s.at</u>  | -0.7746 | -2 | 2.581989 | 0.639793 | 0 |
| 9885 MGC4172    | <u>218756 .s.at</u>  | -0.7746 | -2 | 2.581989 | 0.63996  | 0 |
| 2522 CNOT8      | <u>202162 .s.at</u>  | -0.7746 | -2 | 2.581989 | 0.640038 | 0 |
| 1819 STAT6      | <u>201332 .s.at</u>  | -0.7746 | -2 | 2.581989 | 0.640106 | 0 |
| 5904 KIF1B      | <u>209234 .at</u>    | -0.7746 | -2 | 2.581989 | 0.640122 | 0 |
| 9080 C18ORF24   | <u>217640 .x.at</u>  | -0.7746 | -2 | 2.581989 | 0.640237 | 0 |
| 13949 TFIP11    | <u>227615 .at</u>    | -0.7746 | -2 | 2.581989 | 0.640396 | 0 |
| 1799 C5ORF13    | <u>201310 .s.at</u>  | -0.7746 | -2 | 2.581989 | 0.640413 | 0 |
| 10349 AGPAT3    | <u>219723 .x.at</u>  | -0.7746 | -2 | 2.581989 | 0.640451 | 0 |
| 7387 NBEAL2     | <u>212443 .at</u>    | -0.7746 | -2 | 2.581989 | 0.640599 | 0 |
| 15066 LOC340351 | <u>232395 .x.at</u>  | -0.7746 | -2 | 2.581989 | 0.640634 | 0 |
| 9239 PARVA      | <u>217890 .s.at</u>  | -0.7746 | -2 | 2.581989 | 0.640671 | 0 |
| 8265 WDR67      | <u>214061 .at</u>    | -0.7746 | -2 | 2.581989 | 0.640863 | 0 |
| 10659 RAB33B    | <u>221014 .s.at</u>  | -0.7746 | -2 | 2.581989 | 0.641197 | 0 |
| 2112 RPS17      | <u>201665 .x.at</u>  | -0.7746 | -2 | 2.581989 | 0.641261 | 0 |
| 11003 HKE2      | <u>222019 .at</u>    | -0.7746 | -2 | 2.581989 | 0.641416 | 0 |
| 16197 TFDP1     | <u>242939 .at</u>    | -0.7746 | -2 | 2.581989 | 0.641441 | 0 |
| 16179 PGGT1B    | <u>242844 .at</u>    | -0.7746 | -2 | 2.581989 | 0.641479 | 0 |
| 14995 FAM176B   | <u>232048 .at</u>    | -0.7746 | -2 | 2.581989 | 0.641562 | 0 |
| 3936 ENOSF1     | <u>204143 .s.at</u>  | -0.7746 | -2 | 2.581989 | 0.641951 | 0 |
| 14342 HNMT      | <u>228772 .at</u>    | -0.7746 | -2 | 2.581989 | 0.642301 | 0 |
| 11284 C10ORF84  | <u>222617 .s.at</u>  | -0.7746 | -2 | 2.581989 | 0.642355 | 0 |
| 15182 USP34     | <u>233595 .at</u>    | -0.7746 | -2 | 2.581989 | 0.642544 | 0 |
| 10103 IFT74     | <u>219174 .at</u>    | -0.7746 | -2 | 2.581989 | 0.642591 | 0 |
| 7088 RNF167     | <u>212047 .s.at</u>  | -0.7746 | -2 | 2.581989 | 0.642815 | 0 |
| 2182 ADD3       | <u>201753 .s.at</u>  | -0.7746 | -2 | 2.581989 | 0.642988 | 0 |
| 1692 PITPNA     | <u>201191 .at</u>    | -0.7746 | -2 | 2.581989 | 0.64358  | 0 |
| 12277 FAM100B   | <u>224783 .at</u>    | -0.7746 | -2 | 2.581989 | 0.643583 | 0 |
| 6445 RAD51L1    | <u>210255 .at</u>    | -0.7746 | -2 | 2.581989 | 0.643707 | 0 |
| 2626 STAG1      | <u>202294 .at</u>    | -0.7746 | -2 | 2.581989 | 0.643752 | 0 |
| 11821 C1QTNF5   | <u>223499 .at</u>    | -0.7746 | -2 | 2.581989 | 0.643784 | 0 |
| 10324 FAM61B    | <u>219653 .at</u>    | -0.7746 | -2 | 2.581989 | 0.644431 | 0 |
| 10887 CUGBP1    | <u>221742 .at</u>    | -0.7746 | -2 | 2.581989 | 0.644444 | 0 |
| 10144 SPHK1     | <u>219257 .s.at</u>  | -0.7746 | -2 | 2.581989 | 0.644631 | 0 |
| 7116 LMNA       | <u>212089 .at</u>    | -0.7746 | -2 | 2.581989 | 0.644648 | 0 |
| 9456 HMG20A     | <u>218152 .at</u>    | -0.7746 | -2 | 2.581989 | 0.64468  | 0 |
| 15792 BRD4      | <u>238612 .at</u>    | -0.7746 | -2 | 2.581989 | 0.644752 | 0 |
| 13380 MAP3K2    | <u>226441 .at</u>    | -0.7746 | -2 | 2.581989 | 0.644785 | 0 |
| 12691 AK3L1     | <u>225342 .at</u>    | -0.7746 | -2 | 2.581989 | 0.644799 | 0 |
| 2616 SPTLC1     | <u>202278 .s.at</u>  | -0.7746 | -2 | 2.581989 | 0.644878 | 0 |
| 3123 SOX9       | <u>202936 .s.at</u>  | -0.7746 | -2 | 2.581989 | 0.64488  | 0 |
| 13989 RCN1      | <u>227709 .at</u>    | -0.7746 | -2 | 2.581989 | 0.644964 | 0 |
| 8172 LOC341322  | <u>213817 .at</u>    | -0.7746 | -2 | 2.581989 | 0.645101 | 0 |
| 7179 RBM12      | <u>212170 .at</u>    | -0.7746 | -2 | 2.581989 | 0.645201 | 0 |
| 3246 VPS41      | <u>203106 .s.at</u>  | -0.7746 | -2 | 2.581989 | 0.645253 | 0 |
| 3738 SF3A3      | <u>1554918 .a.at</u> | -0.7746 | -2 | 2.581989 | 0.645813 | 0 |
| 13384 FAM89A    | <u>203818 .s.at</u>  | -0.7746 | -2 | 2.581989 | 0.645884 | 0 |
| 12356 PLDN      | <u>226448 .at</u>    | -0.7746 | -2 | 2.581989 | 0.646588 | 0 |
| 4939 POU2F1     | <u>224883 .at</u>    | -0.7746 | -2 | 2.581989 | 0.646619 | 0 |
| 15609 HTR7      | <u>236281 .x.at</u>  | -0.7746 | -2 | 2.581989 | 0.646951 | 0 |
| 6342 SOCS1      | <u>210001 .s.at</u>  | -0.7746 | -2 | 2.581989 | 0.647096 | 0 |
| 13805 ZNF689    | <u>227294 .at</u>    | -0.7746 | -2 | 2.581989 | 0.64722  | 0 |
| 11816 LRRFIP1   | <u>223492 .at</u>    | -0.7746 | -2 | 2.581989 | 0.647367 | 0 |
| 11381 FLJ13220  | <u>222770 .s.at</u>  | -0.7746 | -2 | 2.581989 | 0.647711 | 0 |
| 135 C10RF55     | <u>1553338 .at</u>   | -0.7746 | -2 | 2.581989 | 0.647786 | 0 |

|                     |              |         |    |          |          |   |
|---------------------|--------------|---------|----|----------|----------|---|
| 9008 SFXN3          | 217226 s.at  | -0.7746 | -2 | 2.581989 | 0.647802 | 0 |
| 14372 PCM1          | 228905 at    | -0.7746 | -2 | 2.581989 | 0.64782  | 0 |
| 14030 WDR53         | 227814 at    | -0.7746 | -2 | 2.581989 | 0.647911 | 0 |
| 12800 ARID2         | 225486 at    | -0.7746 | -2 | 2.581989 | 0.648102 | 0 |
| 11899 NMINAT1       | 223692 at    | -0.7746 | -2 | 2.581989 | 0.648128 | 0 |
| 711 C1ORF53         | 1558508 a.at | -0.7746 | -2 | 2.581989 | 0.648176 | 0 |
| 14544 FAM46B        | 229518 at    | -0.7746 | -2 | 2.581989 | 0.648229 | 0 |
| 2675 GIF2F1         | 202354 s.at  | -0.7746 | -2 | 2.581989 | 0.648795 | 0 |
| 14296 MGC34648      | 228638 at    | -0.7746 | -2 | 2.581989 | 0.648831 | 0 |
| 15906 POGK          | 239392 s.at  | -0.7746 | -2 | 2.581989 | 0.648923 | 0 |
| 343 A1P8B3          | 1554704 at   | -0.7746 | -2 | 2.581989 | 0.648929 | 0 |
| 3106 FAM20B         | 202915 s.at  | -0.7746 | -2 | 2.581989 | 0.648992 | 0 |
| 2584 TRIB1          | 202241 at    | -0.7746 | -2 | 2.581989 | 0.649013 | 0 |
| 11815 COMMD2        | 223491 at    | -0.7746 | -2 | 2.581989 | 0.649032 | 0 |
| 12968 MYSM1         | 225760 at    | -0.7746 | -2 | 2.581989 | 0.649081 | 0 |
| 14923 TUBD1         | 231853 at    | -0.7746 | -2 | 2.581989 | 0.649096 | 0 |
| 13938 ZMYM6         | 227595 at    | -0.7746 | -2 | 2.581989 | 0.649123 | 0 |
| 10545 ZCCHC4        | 220473 s.at  | -0.7746 | -2 | 2.581989 | 0.649136 | 0 |
| 8214 NIPBL          | 213918 s.at  | -0.7746 | -2 | 2.581989 | 0.649163 | 0 |
| 375 DOC1            | 1554966 a.at | -0.7746 | -2 | 2.581989 | 0.649242 | 0 |
| 4695 AKAP7          | 205771 s.at  | -0.7746 | -2 | 2.581989 | 0.649521 | 0 |
| 4879 CHRNA5         | 206533 at    | -0.7746 | -2 | 2.581989 | 0.649539 | 0 |
| 12274 RBM17         | 224780 at    | -0.7746 | -2 | 2.581989 | 0.649745 | 0 |
| 7528 LOC154084      | 212631 at    | -0.7746 | -2 | 2.581989 | 0.649762 | 0 |
| 10828 DKFZP564O0523 | 221595 at    | -0.7746 | -2 | 2.581989 | 0.64978  | 0 |
| 16054 LOC345474     | 241877 at    | -0.7746 | -2 | 2.581989 | 0.649928 | 0 |
| 2382 SPEN           | 201996 s.at  | -0.7746 | -2 | 2.581989 | 0.65008  | 0 |
| 7408 SPAG9          | 212468 at    | -0.7746 | -2 | 2.581989 | 0.650181 | 0 |
| 740 IFT80           | 1558956 s.at | -0.7746 | -2 | 2.581989 | 0.650191 | 0 |
| 923 RAC1            | 1567457 at   | -0.7746 | -2 | 2.581989 | 0.65047  | 0 |
| 8952 CD58           | 216942 s.at  | -0.7746 | -2 | 2.581989 | 0.6506   | 0 |
| 12069 MED28         | 224416 s.at  | -0.7746 | -2 | 2.581989 | 0.650689 | 0 |
| 9758 TMEM57         | 218562 s.at  | -0.7746 | -2 | 2.581989 | 0.650691 | 0 |
| 8109 TUBA1B         | 213646 x.at  | -0.7746 | -2 | 2.581989 | 0.65078  | 0 |
| 15009 DST           | 232098 at    | -0.7746 | -2 | 2.581989 | 0.650982 | 0 |
| 460 P1PRM           | 1555578 at   | -0.7746 | -2 | 2.581989 | 0.651112 | 0 |
| 11398 PRTFDC1       | 222803 at    | -0.7746 | -2 | 2.581989 | 0.6513   | 0 |
| 1396 RPL18A         | 200869 at    | -0.7746 | -2 | 2.581989 | 0.651302 | 0 |
| 12901 SAMD1         | 225650 at    | -0.7746 | -2 | 2.581989 | 0.651431 | 0 |
| 6036 AMACR          | 209425 at    | -0.7746 | -2 | 2.581989 | 0.651688 | 0 |
| 4438 PLCE1          | 205111 s.at  | -0.7746 | -2 | 2.581989 | 0.651744 | 0 |
| 8700 UBE4B          | 215533 s.at  | -0.7746 | -2 | 2.581989 | 0.651773 | 0 |
| 1010 LOC285961      | 1568974 x.at | -0.7746 | -2 | 2.581989 | 0.651846 | 0 |
| 11993 F11R          | 224097 s.at  | -0.7746 | -2 | 2.581989 | 0.651879 | 0 |
| 8904 TBC1D22B       | 216549 s.at  | -0.7746 | -2 | 2.581989 | 0.651952 | 0 |
| 10158 DTWD1         | 219291 at    | -0.7746 | -2 | 2.581989 | 0.652045 | 0 |
| 14707 KHDRBS3       | 230249 at    | -0.7746 | -2 | 2.581989 | 0.652104 | 0 |
| 15509 GM2A          | 235678 at    | -0.7746 | -2 | 2.581989 | 0.65218  | 0 |
| 7544 ZCCHC14        | 212655 at    | -0.7746 | -2 | 2.581989 | 0.652231 | 0 |
| 15233 GKAP1         | 234192 s.at  | -0.7746 | -2 | 2.581989 | 0.65231  | 0 |
| 4948 ACYP2          | 206833 s.at  | -0.7746 | -2 | 2.581989 | 0.652345 | 0 |
| 1917 TIA1           | 201447 at    | -0.7746 | -2 | 2.581989 | 0.652434 | 0 |
| 10068 OBFC1         | 219100 at    | -0.7746 | -2 | 2.581989 | 0.6525   | 0 |
| 15667 TNRC15        | 237052 x.at  | -0.7746 | -2 | 2.581989 | 0.652548 | 0 |
| 16545 C9ORF116      | 59437 at     | -0.7746 | -2 | 2.581989 | 0.652601 | 0 |
| 6989 HNRPA3         | 211930 at    | -0.7746 | -2 | 2.581989 | 0.652743 | 0 |
| 13987 C10ORF118     | 227701 at    | -0.7746 | -2 | 2.581989 | 0.652781 | 0 |

|                     |         |      |         |    |          |          |   |
|---------------------|---------|------|---------|----|----------|----------|---|
| 4767 BRAF           | 206044  | s.at | -0.7746 | -2 | 2.581989 | 0.65294  | 0 |
| 9732 E4F1           | 218524  | .at  | -0.7746 | -2 | 2.581989 | 0.653043 | 0 |
| 1787 MOBK1B         | 201297  | s.at | -0.7746 | -2 | 2.581989 | 0.65318  | 0 |
| 935 LOC162073       | 1568619 | s.at | -0.7746 | -2 | 2.581989 | 0.653297 | 0 |
| 7555 CEP68          | 212675  | s.at | -0.7746 | -2 | 2.581989 | 0.65335  | 0 |
| 8879 TMSB4X         | 216438  | s.at | -0.7746 | -2 | 2.581989 | 0.653488 | 0 |
| 4355 PTPRG          | 204944  | .at  | -0.7746 | -2 | 2.581989 | 0.653579 | 0 |
| 7728 SMC5L1         | 212926  | .at  | -0.7746 | -2 | 2.581989 | 0.653604 | 0 |
| 6499 C10ORF28       | 210455  | .at  | -0.7746 | -2 | 2.581989 | 0.653687 | 0 |
| 1717 ZRANB1         | 201219  | .at  | -0.7746 | -2 | 2.581989 | 0.653689 | 0 |
| 2779 TRIB2          | 202478  | .at  | -0.7746 | -2 | 2.581989 | 0.653705 | 0 |
| 15712 TCF12         | 238041  | .at  | -0.7746 | -2 | 2.581989 | 0.653728 | 0 |
| 15523 TRA2A         | 235716  | .at  | -0.7746 | -2 | 2.581989 | 0.65448  | 0 |
| 5247 NAB1           | 208047  | s.at | -0.7746 | -2 | 2.581989 | 0.654509 | 0 |
| 14441 GAB1          | 229114  | .at  | -0.7746 | -2 | 2.581989 | 0.654614 | 0 |
| 14800 ST8SIA4       | 230836  | .at  | -0.7746 | -2 | 2.581989 | 0.654723 | 0 |
| 472 AP1S3           | 1555731 | a.at | -0.7746 | -2 | 2.581989 | 0.654993 | 0 |
| 4470 SMAD5          | 205187  | .at  | -0.7746 | -2 | 2.581989 | 0.655087 | 0 |
| 16283 CD24          | 266     | s.at | -0.7746 | -2 | 2.581989 | 0.655117 | 0 |
| 15473 MGC10871      | 235511  | .at  | -0.7746 | -2 | 2.581989 | 0.65524  | 0 |
| 11796 DKFZP564J0863 | 223453  | s.at | -0.7746 | -2 | 2.581989 | 0.655349 | 0 |
| 15107 PRICKLE1      | 232811  | x.at | -0.7746 | -2 | 2.581989 | 0.655417 | 0 |
| 269 COG3            | 1554339 | a.at | -0.7746 | -2 | 2.581989 | 0.655607 | 0 |
| 5645 SRI            | 208920  | .at  | -0.7746 | -2 | 2.581989 | 0.655708 | 0 |
| 12568 ARID1B        | 225181  | .at  | -0.7746 | -2 | 2.581989 | 0.655877 | 0 |
| 9730 UBE2W          | 218521  | s.at | -0.7746 | -2 | 2.581989 | 0.655897 | 0 |
| 2000 ZNHIT1         | 201541  | s.at | -0.7746 | -2 | 2.581989 | 0.656211 | 0 |
| 8760 TOP3B          | 215781  | s.at | -0.7746 | -2 | 2.581989 | 0.656344 | 0 |
| 13813 LOC255783     | 227325  | .at  | -0.7746 | -2 | 2.581989 | 0.656665 | 0 |
| 14793 TNRC6B        | 230779  | .at  | -0.7746 | -2 | 2.581989 | 0.656681 | 0 |
| 11290 ZNF639        | 222624  | s.at | -0.7746 | -2 | 2.581989 | 0.656813 | 0 |
| 10263 PRDM10        | 219515  | .at  | -0.7746 | -2 | 2.581989 | 0.656841 | 0 |
| 13782 HSPC182       | 227244  | s.at | -0.7746 | -2 | 2.581989 | 0.657041 | 0 |
| 406 CPEB3           | 1555250 | a.at | -0.7746 | -2 | 2.581989 | 0.657067 | 0 |
| 14184 NDUFB10       | 228301  | x.at | -0.7746 | -2 | 2.581989 | 0.657096 | 0 |
| 13945 DKFZP762N1910 | 227508  | .at  | -0.7746 | -2 | 2.581989 | 0.657455 | 0 |
| 8159 INSR           | 213792  | s.at | -0.7746 | -2 | 2.581989 | 0.657642 | 0 |
| 14292 LOC352767     | 228626  | .at  | -0.7746 | -2 | 2.581989 | 0.657659 | 0 |
| 14252 THAP8         | 228500  | .at  | -0.7746 | -2 | 2.581989 | 0.657814 | 0 |
| 10148 TSPAN12       | 219274  | .at  | -0.7746 | -2 | 2.581989 | 0.658189 | 0 |
| 4000 RLF            | 204243  | .at  | -0.7746 | -2 | 2.581989 | 0.658395 | 0 |
| 9035 ZNF227         | 217403  | s.at | -0.7746 | -2 | 2.581989 | 0.658495 | 0 |
| 2916 RPS19          | 202649  | x.at | -0.7746 | -2 | 2.581989 | 0.658644 | 0 |
| 10465 FLJ20674      | 220137  | .at  | -0.7746 | -2 | 2.581989 | 0.658698 | 0 |
| 7635 SOS1           | 212777  | .at  | -0.7746 | -2 | 2.581989 | 0.658819 | 0 |
| 15507 DHFRL1        | 235675  | .at  | -0.7746 | -2 | 2.581989 | 0.658958 | 0 |
| 1058 RPS5           | 200024  | .at  | -0.7746 | -2 | 2.581989 | 0.659015 | 0 |
| 11588 UCK1          | 223142  | s.at | -0.7746 | -2 | 2.581989 | 0.659189 | 0 |
| 5846 TCF3           | 209153  | s.at | -0.7746 | -2 | 2.581989 | 0.659282 | 0 |
| 6266 CDT1           | 209832  | s.at | -0.7746 | -2 | 2.581989 | 0.659356 | 0 |
| 14604 MCOLN3        | 229797  | .at  | -0.7746 | -2 | 2.581989 | 0.659524 | 0 |
| 15864 LOC346150     | 238972  | .at  | -0.7746 | -2 | 2.581989 | 0.659629 | 0 |
| 12512 ZNF598        | 225104  | .at  | -0.7746 | -2 | 2.581989 | 0.65971  | 0 |
| 10667 PER3          | 221045  | s.at | -0.7746 | -2 | 2.581989 | 0.659725 | 0 |
| 7827 OLFML2A        | 213075  | .at  | -0.7746 | -2 | 2.581989 | 0.659727 | 0 |
| 13576 ZFP1          | 226807  | .at  | -0.7746 | -2 | 2.581989 | 0.659851 | 0 |
| 10538 CYP39A1       | 220432  | s.at | -0.7746 | -2 | 2.581989 | 0.659946 | 0 |

|                    |              |         |    |          |          |   |
|--------------------|--------------|---------|----|----------|----------|---|
| 12175 EIF4EBP2     | 224645 .at   | -0.7746 | -2 | 2.581989 | 0.66002  | 0 |
| 15611 PPM1E        | 236502 .at   | -0.7746 | -2 | 2.581989 | 0.66005  | 0 |
| 12604 SKL          | 225227 .at   | -0.7746 | -2 | 2.581989 | 0.660109 | 0 |
| 15635 YWHAH        | 236559 .at   | -0.7746 | -2 | 2.581989 | 0.660116 | 0 |
| 2077 INSIG1        | 201625 s.at  | -0.7746 | -2 | 2.581989 | 0.66021  | 0 |
| 4464 QPCT          | 205174 s.at  | -0.7746 | -2 | 2.581989 | 0.660377 | 0 |
| 10111 FKBP1        | 219187 .at   | -0.7746 | -2 | 2.581989 | 0.660402 | 0 |
| 4206 GABPB2        | 204618 s.at  | -0.7746 | -2 | 2.581989 | 0.660405 | 0 |
| 8165 KPNB1         | 213803 .at   | -0.7746 | -2 | 2.581989 | 0.660444 | 0 |
| 431 ASAH1          | 1555419 a.at | -0.7746 | -2 | 2.581989 | 0.660468 | 0 |
| 16268 RKHD1        | 244712 .at   | -0.7746 | -2 | 2.581989 | 0.660776 | 0 |
| 6636 SSBP2         | 210829 s.at  | -0.7746 | -2 | 2.581989 | 0.660839 | 0 |
| 12529 ZRANB1       | 225131 .at   | -0.7746 | -2 | 2.581989 | 0.661163 | 0 |
| 89 PDE8A           | 1552931 a.at | -0.7746 | -2 | 2.581989 | 0.661163 | 0 |
| 1685 CHD4          | 201182 s.at  | -0.7746 | -2 | 2.581989 | 0.661435 | 0 |
| 3030 CLDN7         | 202790 .at   | -0.7746 | -2 | 2.581989 | 0.661435 | 0 |
| 11243 ALG5         | 222556 .at   | -0.7746 | -2 | 2.581989 | 0.661452 | 0 |
| 10004 FHOD3        | 218980 .at   | -0.7746 | -2 | 2.581989 | 0.6617   | 0 |
| 1186 GNB2L1        | 200651 .at   | -0.7746 | -2 | 2.581989 | 0.661966 | 0 |
| 1026 ATG10         | 1570523 s.at | -0.7746 | -2 | 2.581989 | 0.662109 | 0 |
| 7976 ST3GAL6       | 213355 .at   | -0.7746 | -2 | 2.581989 | 0.662207 | 0 |
| 12827 C8ORF40      | 225534 .at   | -0.7746 | -2 | 2.581989 | 0.66227  | 0 |
| 3940 TFDP1         | 204147 s.at  | -0.7746 | -2 | 2.581989 | 0.662307 | 0 |
| 1891 SOX4          | 201416 .at   | -0.7746 | -2 | 2.581989 | 0.662512 | 0 |
| 10087 C9ORF95      | 219147 s.at  | -0.7746 | -2 | 2.581989 | 0.662598 | 0 |
| 16260 WBP11        | 244647 .at   | -0.7746 | -2 | 2.581989 | 0.662751 | 0 |
| 14512 TBN          | 2209412 .at  | -0.7746 | -2 | 2.581989 | 0.662988 | 0 |
| 5042 ZNF643        | 207219 .at   | -0.7746 | -2 | 2.581989 | 0.663346 | 0 |
| 14498 NUJCS1       | 229353 s.at  | -0.7746 | -2 | 2.581989 | 0.663364 | 0 |
| 11558 ADPRHL2      | 223097 .at   | -0.7746 | -2 | 2.581989 | 0.66342  | 0 |
| 15498 LOC91801     | 235610 .at   | -0.7746 | -2 | 2.581989 | 0.663434 | 0 |
| 274 MYCPBP         | 1554352 s.at | -0.7746 | -2 | 2.581989 | 0.66357  | 0 |
| 11484 F11R         | 223000 s.at  | -0.7746 | -2 | 2.581989 | 0.663675 | 0 |
| 14273 DKFZP762A217 | 228574 .at   | -0.7746 | -2 | 2.581989 | 0.66399  | 0 |
| 4166 BRCA1         | 204531 s.at  | -0.7746 | -2 | 2.581989 | 0.664097 | 0 |
| 14408 TRERF1       | 229016 s.at  | -0.7746 | -2 | 2.581989 | 0.664286 | 0 |
| 3618 DSCR3         | 203635 .at   | -0.7746 | -2 | 2.581989 | 0.664312 | 0 |
| 14016 COG1         | 227784 s.at  | -0.7746 | -2 | 2.581989 | 0.6645   | 0 |
| 10317 ARMC9        | 219636 s.at  | -0.7746 | -2 | 2.581989 | 0.664689 | 0 |
| 7738 MGA           | 212945 s.at  | -0.7746 | -2 | 2.581989 | 0.664857 | 0 |
| 11236 MAP4K4       | 222548 s.at  | -0.7746 | -2 | 2.581989 | 0.664881 | 0 |
| 11021 SLCO4C1      | 222071 s.at  | -0.7746 | -2 | 2.581989 | 0.66489  | 0 |
| 1256 RPL10         | 200725 x.at  | -0.7746 | -2 | 2.581989 | 0.665078 | 0 |
| 15268 ANKRD11      | 234701 .at   | -0.7746 | -2 | 2.581989 | 0.665086 | 0 |
| 14693 LOC285812    | 230179 .at   | -0.7746 | -2 | 2.581989 | 0.665154 | 0 |
| 10190 LRFN3        | 219346 .at   | -0.7746 | -2 | 2.581989 | 0.665195 | 0 |
| 13909 KIAA0853     | 227536 .at   | -0.7746 | -2 | 2.581989 | 0.665382 | 0 |
| 16100 CGI-100      | 242263 .at   | -0.7746 | -2 | 2.581989 | 0.665476 | 0 |
| 10988 CTGLF1       | 221971 x.at  | -0.7746 | -2 | 2.581989 | 0.665489 | 0 |
| 5918 CSPG6         | 209257 s.at  | -0.7746 | -2 | 2.581989 | 0.665626 | 0 |
| 12696 FUSIP1       | 225348 .at   | -0.7746 | -2 | 2.581989 | 0.665672 | 0 |
| 14406 EMP1         | 229011 .at   | -0.7746 | -2 | 2.581989 | 0.665706 | 0 |
| 8702 DDAH2         | 215537 x.at  | -0.7746 | -2 | 2.581989 | 0.665707 | 0 |
| 3886 CHST10        | 204065 .at   | -0.7746 | -2 | 2.581989 | 0.665855 | 0 |
| 7688 DCUN1D4       | 212855 .at   | -0.7746 | -2 | 2.581989 | 0.665879 | 0 |
| 462 MBNL1          | 1555594 a.at | -0.7746 | -2 | 2.581989 | 0.665964 | 0 |
| 8957 KIF22         | 216969 s.at  | -0.7746 | -2 | 2.581989 | 0.666459 | 0 |

15707 RPL35A

[238026.at](#)

-0.7746

-2 2.581989 0.66655

0
